# Supplementary material for: Risk factors for drug-resistant tuberculosis, the association between comorbidity status and drug-resistant patterns: a retrospective study of previously treated pulmonary tuberculosis in Shandong, China, during 2004–2019
Source: PubMed Central journal article supplement — BMJ Open. 2021 Jun 16;11(6):e044349. doi: 10.1136/bmjopen-2020-044349 (PMC8211042; doi:10.1136/bmjopen-2020-044349), 2021-06-16
Supplement: bmjopen-2020-044349.draft_revisions.pdf [file bmjopen-2020-044349.draft_revisions.pdf]

# BMJ Open

BMJ Open is committed to open peer review. As part of this commitment we make the peer review history of every article we publish publicly available.

When an article is published we post the peer reviewers' comments and the authors' responses online. We also post the versions of the paper that were used during peer review. These are the versions that the peer review comments apply to.

The versions of the paper that follow are the versions that were submitted during the peer review process. They are not the versions of record or the final published versions. They should not be cited or distributed as the published version of this manuscript.

BMJ Open is an open access journal and the full, final, typeset and author-corrected version of record of the manuscript is available on our site with no access controls, subscription charges or pay-per-view fees (<http://bmjopen.bmj.com>).

If you have any questions on BMJ Open's open peer review process please email [info.bmjopen@bmj.com](mailto:info.bmjopen@bmj.com)

# BMJ Open

## The association between drug resistant tuberculosis and comorbidity status

|                               |                                                                                                                                                                                                                                                                                                                                                                                                                                                                                                                                          |
|-------------------------------|------------------------------------------------------------------------------------------------------------------------------------------------------------------------------------------------------------------------------------------------------------------------------------------------------------------------------------------------------------------------------------------------------------------------------------------------------------------------------------------------------------------------------------------|
| Journal:                      | <i>BMJ Open</i>                                                                                                                                                                                                                                                                                                                                                                                                                                                                                                                          |
| Manuscript ID                 | bmjopen-2020-044349                                                                                                                                                                                                                                                                                                                                                                                                                                                                                                                      |
| Article Type:                 | Original research                                                                                                                                                                                                                                                                                                                                                                                                                                                                                                                        |
| Date Submitted by the Author: | 07-Sep-2020                                                                                                                                                                                                                                                                                                                                                                                                                                                                                                                              |
| Complete List of Authors:     | Tao, Ning; Shandong Provincial Hospital, Department of Respiratory and Critical Care Medicine<br>Li, Yi-fan ; Shandong Provincial Hospital<br>Song, Wan-mei ; Shandong Provincial Hospital<br>Liu, Jin-yue ; Shandong Provincial Third Hospital<br>Zhang, Qian-yun ; Shandong Provincial Hospital<br>Xu, Ting-ting ; Shandong Provincial Hospital<br>Li, Shi-jin ; Shandong Provincial Hospital<br>An, Qi-qi ; Shandong Provincial Hospital<br>Liu, Si-qi ; Shandong Provincial Hospital<br>Li, Huai-chen ; Shandong Provincial Hospital |
| Keywords:                     | EPIDEMIOLOGY, INFECTIOUS DISEASES, Public health < INFECTIOUS DISEASES, Tuberculosis < INFECTIOUS DISEASES                                                                                                                                                                                                                                                                                                                                                                                                                               |
|                               |                                                                                                                                                                                                                                                                                                                                                                                                                                                                                                                                          |

SCHOLARONE™  
Manuscripts

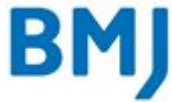

I, the Submitting Author has the right to grant and does grant on behalf of all authors of the Work (as defined in the below author licence), an exclusive licence and/or a non-exclusive licence for contributions from authors who are: i) UK Crown employees; ii) where BMJ has agreed a CC-BY licence shall apply, and/or iii) in accordance with the terms applicable for US Federal Government officers or employees acting as part of their official duties; on a worldwide, perpetual, irrevocable, royalty-free basis to BMJ Publishing Group Ltd ("BMJ") its licensees and where the relevant Journal is co-owned by BMJ to the co-owners of the Journal, to publish the Work in this journal and any other BMJ products and to exploit all rights, as set out in our [licence](#).

The Submitting Author accepts and understands that any supply made under these terms is made by BMJ to the Submitting Author unless you are acting as an employee on behalf of your employer or a postgraduate student of an affiliated institution which is paying any applicable article publishing charge ("APC") for Open Access articles. Where the Submitting Author wishes to make the Work available on an Open Access basis (and intends to pay the relevant APC), the terms of reuse of such Open Access shall be governed by a Creative Commons licence – details of these licences and which [Creative Commons](#) licence will apply to this Work are set out in our licence referred to above.

Other than as permitted in any relevant BMJ Author's Self Archiving Policies, I confirm this Work has not been accepted for publication elsewhere, is not being considered for publication elsewhere and does not duplicate material already published. I confirm all authors consent to publication of this Work and authorise the granting of this licence.

## The association between drug resistant tuberculosis and comorbidity status

Ning-ning Tao<sup>1\*</sup>, Yi-fan Li<sup>1\*</sup>, Wan-mei Song<sup>1,2</sup>, Jin-yue Liu<sup>3</sup>, Qian-yun Zhang<sup>1,2</sup>, Ting-ting Xu<sup>1</sup>, Shi-jin Li<sup>1,2</sup>, Qi-qi An<sup>1,2</sup>, Si-qi Liu<sup>1,2</sup>, Huai-chen Li<sup>1,4#</sup>

Affiliations:

1. Department of Respiratory and Critical Care Medicine, Shandong Provincial Hospital Affiliated to Shandong University, Shandong Provincial Hospital Affiliated to Shandong First Medical University, 250021 Jinan, Shandong, People's Republic of China.
2. Cheeloo College of Medicine, Shandong University, 250012 Jinan, Shandong, People's Republic of China.
3. Department of [Intensive Care Unit](#), Shandong Provincial Third Hospital, 100191 Jinan, Shandong, People's Republic of China.
4. College of Traditional Chinese Medicine, Shandong University of Traditional Chinese Medicine, 250355 Jinan, Shandong, People's Republic of China.

\* Ning-ning Tao and Yi-fan Li contributed equally to this work.

#Address for correspondence:

Huai-chen Li (<sup>1</sup>Department of Respiratory and Critical Care Medicine, Shandong Provincial Hospital Affiliated to Shandong University, Shandong Provincial Hospital Affiliated to Shandong First Medical University, 324 Jingwuweiqi Road, Huaiyin District, Jinan 250021, Shandong, People's Republic of China; <sup>4</sup>Department of Chinese Medicine Integrated with Western Medicine, College of Traditional Chinese Medicine,

1  
2  
3  
4 Shandong University of Traditional Chinese Medicine, 16369 Jingshi Road, Lixia  
5  
6 District, Jinan 250355, Shandong, People's Republic of China; Tel +86-13031737646  
7  
8  
9 Email [lihuaichen@163.com](mailto:lihuaichen@163.com))  
10

11  
12 **Abstract:**  
13

14 **Objectives:** This study was designed to identify the association of  
15  
16 comorbidity and drug-resistance among retreated pulmonary tuberculosis  
17  
18 (PTB).  
19

20  
21  
22 **Design:** A retrospective study.  
23

24  
25 **Setting:** All the 36 monitoring sites in Shandong Province were included.  
26  
27 TB Surveillance System were searched.  
28

29  
30 **Participants:** A total of 10,975 PTB patients were recorded during 2004-  
31  
32 2019. Finally 1924 retreated PTB were included.  
33

34  
35 **Results:** Among 1924 retreated PTB, 26.2% were DR-TB, 12.5% had  
36  
37 comorbidity. Smoking (adjusted odds ratio (aOR): 1.69, 95% confidence  
38  
39 interval (CI): 1.19-2.39), cavity (aOR: 1.55, 95%CI: 1.22-1.97),  
40  
41 comorbidity (aOR: 1.44, 95%CI: 1.02-2.02) were risk factors for DR-TB.  
42  
43 Of 504 DR-TB, 9.5% had diabetes mellitus (DM), followed by  
44  
45 hypertension 2.0% and chronic obstructive pulmonary disease (COPD)  
46  
47 1.8%. Retreated PTB with comorbidity were more likely to be older, to  
48  
49 have more bad habits (smoking, alcohol abuse) and clinical symptoms  
50  
51 (expectoration, hemoptysis, weight loss). Comorbidity was significantly  
52  
53 associated with DR-TB (aOR: 1.44, 95%CI: 1.02-2.02), overall rifampin  
54  
55  
56  
57  
58  
59  
60

(RFP) resistance (aOR: 2.17, 95%CI: 1.41-3.36), overall streptomycin (SM) resistance (aOR: 1.51, 95%CI: 1.00-2.27), and multidrug resistance (MDR) (aOR: 1.96, 95%CI: 1.17-3.27) compared with pan-susceptible patients (P<0.05).

**Conclusion:** This study demonstrated that comorbidity was a risk factor for DR and MDR of retreated PTB patients. The strategies to improve host health including smoking cessation, screening and treatment of comorbidity might contribute to the control of TB, especially DR-TB in China.

**Strengths and limitations of this study:**

This seems to be one of the largest retrospective studies from the aspect of time span (16-years) to describe the association between comorbidity status and DR-TB among retreated PTB patients in Shandong province, China.

This study detailed the relationships between comorbidity and DR-TB by specifying different DR types.

DST for second-line anti-TB drugs were not routinely conducted in China, thus only DR for first-line anti-TB drugs were included.

All comorbidities were calculated as a whole factor in this study.

**Keywords:** drug resistance, retreated pulmonary tuberculosis, comorbidity, risk factor

**Introduction:**

1  
2  
3  
4 With the changing of demographic and lifestyle, the spectrum of disease  
5  
6 has been transformed from infectious diseases to noncommunicable  
7  
8 diseases (NCDs) [1]. However, people from developing country suffered  
9  
10 from double burden of infectious diseases and NCDs [2]. As an infectious  
11  
12 disease, tuberculosis (TB) can be prevented and well treated. Although the  
13  
14 control of TB achieved considerable progress in the past decades, the work  
15  
16 seems to reach its bottleneck recently with 1.45 million death caused by  
17  
18 TB which ranks the topmost cause of death among infectious agents [3].  
19  
20 The overlapping TB and comorbidities amplify the risk and mortality of  
21  
22 the other [1]. Bidirectional deleterious correlation between TB and  
23  
24 coexisting disease might open up a new direction for future TB control.  
25  
26  
27  
28  
29  
30  
31

32 Drug-resistance is a intractable public problem and a crucial obstacle to  
33  
34 the control of TB. According to the 2019 global TB report, about 1/2  
35  
36 million new cases were rifampicin resistant TB (RR-TB), among which 78%  
37  
38 cases were multidrug-resistant TB (MDR-TB), a kind of resistance to both  
39  
40 isoniazid (INH) and rifampicin (RFP). Drug-resistance not only was an  
41  
42 indicator of poor outcomes, it also resulted in fewer effective drugs to  
43  
44 choose, higher expenses to pay, the spreading and amplifying of DR-TB  
45  
46 [4, 5]. Patients with previously anti-TB treatment history were at high risk  
47  
48 to develop DR-TB. Compared with newly treated TB cases (3.4%), the rate  
49  
50 of MDR/RR-TB were 18% among retreated cases [3]. The control of DR-  
51  
52 TB especially those among retreated patients are imperative.  
53  
54  
55  
56  
57  
58  
59  
60

1  
2  
3  
4 Various studies and reviews reported that host factors including smoking,  
5 alcohol abuse, low body mass index (BMI), comorbidity (e.g. HIV  
6 infection; diabetes mellitus, DM; chronic renal failure, CRF; malignancy,  
7 chronic obstructive pulmonary disease, COPD; silicosis) can predispose to  
8 the development of TB [6-12]. Several of those factors were associated  
9 with poor treatment outcomes (e.g. alcohol abuse, HIV infection, DM) [13,  
10 14], TB relapse (e.g. HIV infection, DM) [13, 15] and the development of  
11 MDR-TB (e.g. alcohol abuse, HIV infection, DM, COPD) significantly [6,  
12 16, 17]. Coexisting disease are continuously being identified as a vital  
13 factor for the control of TB. It's believed that the improvement of host  
14 health status both timely identification and effective treatment of  
15 comorbidity may alleviate the development of TB and decrease the spread  
16 of DR-TB.  
17  
18  
19  
20  
21  
22  
23  
24  
25  
26  
27  
28  
29  
30  
31  
32  
33  
34  
35  
36

37 Although China is a upper middle income country with half population  
38 resided in urban area, the burden of DR-TB (only followed behind India)  
39 and NCDs are very serious. This study aims to summarize the  
40 characteristics of host status, DR types of retreated pulmonary TB (PTB),  
41 to identify the risk factor for drug-resistance of these patients, and to  
42 evaluate the contribution of comorbidity to different DR types among  
43 retreated PTB in Shandong Province, China, during 2004-2019.  
44  
45  
46  
47  
48  
49  
50  
51  
52  
53  
54

## 55 **Methods:**

## 56 **Ethics statement**



1  
2  
3  
4 Ethical approvals of this study were obtained from the Ethics Committee  
5  
6 of Shandong Provincial Hospital, affiliated with Shandong University,  
7  
8 Shandong, China. Before analysis and reporting, patient records were  
9  
10 anonymized and de-identified. The Ethics Committee waived the necessity  
11  
12 of informed consent because the retrospective nature of this study.  
13  
14  
15

### 16 17 **Setting**

18  
19 This retrospective cohort study was conducted in the second most  
20  
21 populous province of China, Shandong province. In 2019, about 100.47  
22  
23 million populations resided in an area of 157,100 km<sup>2</sup> in Shandong  
24  
25 province, which located at 36°24'N latitude 118°24'E longitude with 17  
26  
27 municipalities and 137 counties (districts) (<http://www.stats-sd.gov.cn/>).  
28  
29  
30  
31

### 32 33 **Study population and data collection**

34  
35 In Shandong province, there are 13 municipal-level local health  
36  
37 departments, two province-level and 21 county-level hospitals which were  
38  
39 responsible for the quality assessment in surveillance of TB. We searched  
40  
41 the TB Surveillance System in Shandong and collected information for  
42  
43 PTB patients with full data on comorbidity status and drug-susceptibility  
44  
45 testing (DST) results (at least for all the four first-line anti-TB drugs)  
46  
47 during 2004-2019. We ruled out those patients who without information  
48  
49 on comorbidity status, with extra-pulmonary TB or *Nontuberculosis*  
50  
51 *mycobacteria* (NTM) infection (Fig. 1). A total of 9,051 newly treated and  
52  
53 1,924 retreated PTB cases were detected. Of all the retreated PTB patients  
54  
55  
56  
57  
58  
59  
60

1  
2  
3  
4 with *Mycobacterium tuberculosis* (MTB) infection, 1,683 had no  
5  
6 comorbidity, and 241 had at least one comorbidity. Demographic  
7  
8 information (age, sex) and clinical information (BMI, smoking, alcohol  
9  
10 abuse, cavity, and symptoms) were collected.  
11  
12

### 13 14 **Laboratory diagnosis and drug susceptibility testing**

15  
16  
17 All samples available from suspicious patients were collected by  
18  
19 specialist at each surveillance site. One patient should offer at least two  
20  
21 sputum samples for the examinations of bacteriologic culture, species  
22  
23 identification, and DST. The smear microscopy with Ziehl-Neelsen staining  
24  
25 was performed to identify acid-fast bacilli. Each sample was inoculated  
26  
27 into tubes with acidified Löwenstein-Jensen medium for further culture  
28  
29  
30 into tubes with acidified Löwenstein-Jensen medium for further culture  
31  
32 [18]. Subsequently, the samples with growing colonies were tested for  
33  
34 strain identification and DST. The distinguish of MTB from other  
35  
36 *Mycobacteria spp* were comprehensive considerations of growth  
37  
38 characteristics, morphologic characteristics of the colony, inhibition by p-  
39  
40 nitrobenzoic acid, ect [19].  
41  
42  
43  
44

45  
46 DST for first-line anti-TB drugs was performed using the proportion  
47  
48 method on Löwenstein-Jensen medium with the following drug  
49  
50 concentrations: INH (0.2 µg/mL), RFP (40 µg/mL), ethambutol (EMB, 2.0  
51  
52 µg/mL), and streptomycin (SM, 4.0 µg/mL). DST for other anti-TB drugs  
53  
54 such as pyrazinamide, fluoroquinolone, and kanamycin was performed  
55  
56 according to the patients' option which was non-routinely.  
57  
58  
59  
60

## Quality Control

All procedures during TB surveillance were carried out according to WHO guidelines. External quality assessment (EQA) for all laboratory tests including smear, culture, and DST was supervised by Superior TB National Reference laboratory in Katharine Hsu Center of Shandong Province [18]. The quality assessment and data extraction were accomplished by at least two researchers who were trained professionally.

## Definitions

Drug-susceptible TB defined as susceptible to all the four first-line anti-TB drugs. DR-TB were classified into mono-resistance (MR), only resistant to one first-line anti-TB drug; multidrug resistance (MDR), at least resistant to both INH and RFP; polydrug resistance (PDR), resistant to at least two first-line anti-TB drug, except to both INH and RFP. Retreated TB referred to the patients who had accepted 1 month of anti-TB drugs before.

The comorbidity information collected in this study were DM, hypertension, hepatitis, CRF, connective tissue disease (CTD), disability, malignancy, HIV infection, silicosis, asthma, COPD, and bronchiectasia co-occurring with TB. The confirmation of comorbidity status mainly from two ways: 1) self-reported by the patient with a previously diagnosis certificate; 2) new identified cases according to associated diagnostic consensus unified globally.

## Statistical analysis

Continuous variables such as age were summarized with mean and standard deviation (SD); categorical variables including sex, BMI (<18.5, 18.5-24.9,  $\geq 25$ ), drinking history, smoking history, TB contact history, cavity, symptoms (cough, expectoration, fever, night sweating, fatigue, haemoptysis, weight loss, and chest pain), comorbidities (silicosis, asthma, COPD, bronchiectasia, lung cancer, DM, hypertension, gastrointestinal cancer, hepatitis, renal failure, CTD, other malignancy) were summarized as proportions. Univariable analysis and multivariable logistic models were applied to identify the risk factors of drug-resistance among newly treated or retreated PTB cases. Demographic characteristics, clinical traits and DR types were compared according to the comorbidity status using Fisher's exact or Pearson  $\chi^2$  test. Multivariable logistic models were also used to estimate the influence of comorbidity on different DR types with the covariates adjusted by age, sex, BMI, drinking history, smoking history, and cavity according to published researches. A two-sided  $P < 0.05$  was considered to be significant. All statistical analyses were calculated by using SPSS software, version 20.0.

## Results:

### Case estimates and risk factors of DR-TB

Baseline characteristics of the study populations were demonstrated in Table 1. A total of 10,975 PTB patients aged  $49.8 \pm 19.7$  were reported in

1  
2  
3  
4 Shandong, China, 2004-2019, of which 9,051 (82.5%) cases were newly  
5  
6 treated and 1,924 (17.5%) cases were retreated PTB. Among these  
7  
8 retreated PTB cases, 26.2% were DR cases, 82.7% males, 18.5% drinker,  
9  
10 25.2% smoker, 46.4% with baseline cavity and 16.3% had comorbidity.  
11  
12

13  
14 Of all retreated PTB cases, the following characteristics were  
15  
16 associated with the presence of DR-TB: 1) smoking (adjusted odds ratio  
17  
18 (aOR): 1.69, 95% confidence interval (CI): 1.19-2.39); 2) had cavity (aOR:  
19  
20 1.55, 95%CI: 1.22-1.97); 3) had comorbidity (aOR: 1.44, 95%CI: 1.02-  
21  
22 2.02). Of all newly treated PTB cases, male sex (aOR: 1.25, 95%CI: 1.03-  
23  
24 1.51) and cavity (aOR: 1.15, 95%CI: 1.01-1.31) were associated with the  
25  
26 presence of DR-TB.  
27  
28  
29  
30  
31

### 32 **Demographic and clinical characteristics of retreated PTB**

33  
34 A total of 241 (12.5%) retreated PTB patients with comorbidity (Group  
35  
36 A, A) and 1,683 (87.5%) with no comorbidity (Group B, B) were enrolled  
37  
38 in this study. According to Pearson  $\chi^2$  test, retreated PTB patients with  
39  
40 comorbidity were more likely than those without comorbidity to be older  
41  
42 (A vs B: 60.1±15.9 vs 49.1±19.6,  $p < 0.001$ ), to be male (A vs B: 87.1% vs  
43  
44 80.9%,  $p < 0.001$ ), with BMI  $\geq 25$  (A vs B: 7.9% vs 3.4%,  $p = 0.02$ ), to  
45  
46 abuse alcohol (A vs B: 24.9% vs 17.0%,  $p = 0.003$ ), to be smoker (A vs B:  
47  
48 30.0% vs 19.5%,  $p < 0.001$ ), to had cavity (A vs B: 52.5% vs 35.1%,  $p <$   
49  
50 0.001), and to had more symptoms including expectoration (A vs B: 85.1%  
51  
52 vs 77.2%,  $p = 0.006$ ), hemoptysis (A vs B: 22.0% vs 12.7%,  $p < 0.001$ ),  
53  
54  
55  
56  
57  
58  
59  
60

1  
2  
3  
4 and weight loss (A vs B: 19.5% vs 13.5%,  $p = 0.012$ ). (Table 2)  
5

### 6 **Drug-resistant profiles of retreated PTB**

7  
8  
9 About 34.0% (82) retreated PTB patients with comorbidity and 25.1%  
10 (422) without comorbidity were DR-TB,  $P = 0.003$ . After further dividing  
11 into different DR subgroups, it showed that the rate of overall INH  
12 resistance (A vs B: 22.8% vs 16.0%,  $p = 0.008$ ), overall RFP resistance (A  
13 vs B: 19.5% vs 10.8%,  $p < 0.001$ ), MR to INH (A vs B: 3.7% vs 1.4%,  $p =$   
14 0.007), PDR to RFP+SM (A vs B: 1.2% vs 0.2%,  $p = 0.029$ ), MDR (A vs  
15 B: 12.9% vs 7.7%,  $p = 0.006$ ), and resistance to INH + RFP + SM (A vs B:  
16 6.6% vs 3.6%,  $p = 0.026$ ) were much higher in group A than group B. No  
17 significant differences on the rates of other DR subgroups between group  
18 A and group B were identified ( $p > 0.05$ ). (Table 3)  
19  
20  
21  
22  
23  
24  
25  
26  
27  
28  
29  
30  
31  
32  
33  
34

### 35 **Comorbidities detected among retreated PTB**

36  
37 Among 241 (12.5%) retreated PTB patients with comorbidity, extra-  
38 pulmonary comorbidity accounted for 77.6% (187), pulmonary  
39 comorbidity 27.4% (66), both pulmonary and extra-pulmonary  
40 comorbidity 5.0% (12), DM 51.5% (124), COPD 16.6% (40). Among 504  
41 retreated PTB patients with drug-resistance, 16.3% had comorbidity, 13.7%  
42 had extra-pulmonary comorbidity, and 3.4% had pulmonary comorbidity.  
43 The highest proportion of comorbidity was found for DM (9.5%), followed  
44 by hypertension (2.0%), and COPD (1.8%). Of 82 retreated PTB patients  
45 with DR and baseline comorbidity, 87.8% (72) had only one kind  
46  
47  
48  
49  
50  
51  
52  
53  
54  
55  
56  
57  
58  
59  
60

1  
2  
3  
4 comorbidity, 15.9% (13) had pulmonary comorbidity alone, 79.3% (65)  
5  
6 had extra-pulmonary comorbidity alone, and 4.9% (4) had both pulmonary  
7  
8 and extra-pulmonary comorbidity. (Table 4)  
9  
10

### 11 **Association between comorbidity status and DR profiles of retreated** 12 **PTB** 13 14

15  
16  
17 According to the univariable analysis and multivariable analysis, overall  
18  
19 DR (OR: 1.54, 95%CI: 1.16-2.06; aOR:1.44, 95%CI: 1.02-2.02), overall  
20  
21 RFP resistance (OR: 2.05, 95%CI: 1.43-2.94; aOR:2.17, 95%CI: 1.41-  
22  
23 3.36), overall SM resistance (OR: 1.48, 95%CI: 1.05-2.08; aOR:1.51,  
24  
25 95%CI: 1.00-2.27), and MDR (OR: 1.91, 95%CI: 1.25-2.92; aOR:1.96,  
26  
27 95%CI: 1.17–3.27) had a significant association with comorbidity,  $P < 0.05$ .  
28  
29 Comorbidity was significantly associated with overall INH (OR:1.62,  
30  
31 95%CI: 1.16-2.26) and PDR (OR:1.74, 95%CI: 1.05-2.87) in univariable  
32  
33 analysis,  $P < 0.05$ , but not in multivariable analysis,  $P > 0.05$ . (Table 5)  
34  
35  
36  
37  
38  
39

### 40 **Discussion:** 41 42

43 This retrospective cohort study of PTB patients in Shandong province of  
44  
45 China illustrates the risk factors of retreated PTB and the association  
46  
47 between comorbidity status and DR profiles among these patients during  
48  
49 the past 16-years. This study achieves several findings including: 1) among  
50  
51 1924 retreated PTB cases, 26.2% were DR-TB, 12.5% had comorbidity; 2)  
52  
53 smoking/cavity/comorbidity were risk factors for DR among retreated PTB;  
54  
55  
56 3) among 241 retreated PTB patients with comorbidity, DM had the  
57  
58  
59  
60

1  
2  
3  
4 highest percentage (51.5%), followed by COPD (16.6%); 4) retreated PTB  
5  
6 with comorbidity were more likely to be male, to be older, with BMI  $\geq 25$ ,  
7  
8 to abuse cigarette/alcohol, to have clinical symptoms (expectoration,  
9  
10 hemoptysis, weight loss), and to be DR-TB; 5) with comorbidity also was  
11  
12 a risk factor for overall RFP resistance, overall SM resistance, and MDR  
13  
14 of retreated PTB.  
15  
16  
17  
18

19  
20 Globally, the number of TB has been relatively stable which maintained  
21  
22 at  $\approx 10.0$  million in recent years. Only 6.3% reduction of TB incidence and  
23  
24 11% of TB deaths occurred during 2015-2018, far away from the goal of  
25  
26 20% and 35% reduction of TB incidence and death in End TB Strategy  
27  
28 from 2015 to 2020 [3]. As a major obstacle of TB control, the prevention  
29  
30 and treatment of DR-TB are intractable and urgent. Followed after India  
31  
32 (27%), China had the second largest number of MDR/RR-TB about 66,000  
33  
34 (50,000-85,000) cases which accounted for 14% of global burden. The rate  
35  
36 of MDR/RR-TB is more seriously among retreated patients (21%) which  
37  
38 amounts to three times of newly treated patients (7.1%) in China [3]. Even  
39  
40 terribly, only 1/3 of these MDR/RR-TB patients enrolled in the treatment,  
41  
42 and China along with India contributed to nearly half (43%) of these gap  
43  
44 between estimated and treatment cases [3]. In this study, 17.5% patients  
45  
46 were retreated PTB, among which 26.2% were DR-TB and 20.2% were  
47  
48 MDR/RR-TB. With limited drugs effective, the treatment of DR-TB,  
49  
50 especially MDR-TB and extensively drug-resistant TB (XDR-TB) are  
51  
52  
53  
54  
55  
56  
57  
58  
59  
60



1  
2  
3  
4 costly, complicated, and more likely to have poor treatment outcomes [20,  
5  
6  
7 21]. The control of DR-TB especially among those with treatment history  
8  
9 is vital to the eradication of TB.

10  
11 The improvement of health-associated risk factors (e.g. smoking, DM,  
12  
13 HIV infection) can mitigate the development and mortality of TB [3]. In  
14  
15 this study, 18% of retreated PTB abuse alcohol, 20.9% were smoker, 12.5%  
16  
17 had comorbidity. Moreover, smoking and comorbidity were risk factors for  
18  
19 the drug-resistance among retreated PTB patients. Based on real world  
20  
21 researches, TB, smoking, COPD and HIV have deleterious and synergistic  
22  
23 relationship [22]. There's reason to believe that special attention on the  
24  
25 population who were at high risk to development TB especially DR-TB  
26  
27 can reduce the rate of missed diagnosis and contribute to the control of TB.  
28  
29 However, traditional disease-specific health-care strategy may be less  
30  
31 effective, multidisciplinary co-operation and integrated therapies towards  
32  
33 high-risk population are urgently needed.

34  
35 The correlations between TB and overlapping comorbid diseases are  
36  
37 well recognized previously. On one hand, comorbidity can increase TB  
38  
39 incidence and mortality. Extra-pulmonary comorbidity (e.g. HIV infection,  
40  
41 DM, CKD) can facilitate the development of TB by impairing immune  
42  
43 function, increasing bacterial loads [23-25]. While pulmonary comorbidity  
44  
45 such as COPD can promote the process of TB by damaging innate lung  
46  
47 defence, impairing lung function, and changing lung structure [26, 27]. In  
48  
49  
50  
51  
52  
53  
54  
55  
56  
57  
58  
59  
60

1  
2  
3  
4 this study, 12.5% retreated PTB had comorbidity, among which DM  
5  
6 (51.5%) accounted for a half, followed by COPD (16.6%). DM is one  
7  
8 confirmed risk factor for TB which account for 6-24% of TB burden  
9  
10 according to geography disparity [28]. DM and COPD can increase the risk  
11  
12 of TB by 3.11 (95% CI: 2.27-4.26) and 2.47 (95% CI: 2.21-2.76) compared  
13  
14 to control group [11, 29]. What's more, previous studies revealed that TB  
15  
16 and COPD played bi-directional roles by acting as an independent risk  
17  
18 factor for the other [30]. TB patients with comorbidity are at increased risk  
19  
20 to be aggravated and die [31, 32]; even some patients who have a latent TB  
21  
22 infection and other patients that complete the treatment or are cured could  
23  
24 further impede TB control by reactivating or relapsing [11, 31].  
25  
26  
27  
28  
29  
30  
31

32 On the other hand, comorbidity can facilitate the development of DR  
33  
34 among TB patients. One study in Mexican demonstrated that the proportion  
35  
36 of DM among TB patients with and without MDR were significantly  
37  
38 different (47.2 vs. 28.1%;  $p < 0.05$ ) [16]. TB patients with COPD were 2  
39  
40 times higher to be death [31] and 2.5 times higher to have MDR-TB [6]  
41  
42 than those without COPD. However, previous studies of correlations  
43  
44 between TB and coexisting disease mainly focused on the specific DR type  
45  
46 (MDR) and view all TB patients as a whole. So far, studies of these  
47  
48 correlations on other DR types among retreated PTB patients were very  
49  
50 limited. In this study, comorbidity not only was a risk factor for DR-TB  
51  
52 and MDR-TB, but also contributed to overall RFP resistance and overall  
53  
54  
55  
56  
57  
58  
59  
60

SM resistance among retreated PTB patients.

Similarly with previous researches that TB and coexisting disease shared risk factors: age, BMI, cigarette abuse [30, 33]. This study showed that retreated PTB with comorbidity were more likely to be male, to be older, with BMI  $\geq 25$ , and to abuse cigarette/alcohol than those without comorbidity. Moreover, the higher proportion of expectoration and haemoptysis among retreated PTB patients with comorbidity may be attributed to coexisting pulmonary disease.

### **Conclusion:**

In summary, this study elaborates that retreated PTB patients with comorbidity are more likely to be older, with higher proportion of symptoms and to be DR-TB compared to those without comorbidity in Shandong Province, China. Comorbidity is a risk factor for DR (overall DR, overall RFP resistance, overall SM resistance, MDR) among retreated PTB patients. This study points out several directions for the control of retreated PTB: 1) the improvement of baseline health should be part of TB control; 2) bidirectional screening and coordinated treatment for both TB and comorbidity should be advocated; 3) attention on the DR surveillance among TB patients, especially among who had comorbidity were imperative.

### **Conflict of interests**

The authors state that they have no conflicts of interest.

## Funding statement

This work was supported by Department of Science & Technology of Shandong Province (CN) (No.2007GG30002033; 2015GSF121052; No.2017GSF218052) and Jinan Science and Technology Bureau (CN) (No.201704100).

## Authors' contributions

NNT, YFL and HCL designed this study and drafted the initial manuscript. SSW, JYL, QYZ and TTX collected and analyzed the data. SJL, QQA and SQL coordinated and supervised data collection, constructed the figures and tables.

## Patient and Public Involvement

Not appropriate.

## References

1. Marais BJ, Lonnroth K, Lawn SD, Migliori GB, Mwaba P, Glaziou P, Bates M, Colagiuri R, Zijenah L, Swaminathan S *et al*: **Tuberculosis comorbidity with communicable and non-communicable diseases: integrating health services and control efforts.** *LANCET INFECT DIS/21372* 2013, **13**(5):436-448.
2. Bygbjerg IC: **Double burden of noncommunicable and infectious diseases in developing countries.** *SCIENCE/34661* 2012, **337**(6101):1499-1501.
3. **World Health Organization. Global tuberculosis report 2019.** Geneva: World Health Organization; 2019 2019, **WHO/CDS/TB/2019.15**.
4. Monedero I, Caminero JA: **Management of multidrug-resistant tuberculosis: an update.** *THER ADV RESPIR DIS/2286* 2010, **4**(2):117-127.
5. Perri BR, Proops D, Moonan PK, Munsiff SS, Kreiswirth BN, Kurepina N, Goranson C, Ahuja SD: **Mycobacterium tuberculosis cluster with developing drug resistance, New York, New York, USA, 2003-2009.** *EMERG INFECT DIS/6994* 2011, **17**(3):372-378.
6. Pradipta IS, Forsman LD, Bruchfeld J, Hak E, Alffenaar JW: **Risk factors of multidrug-resistant tuberculosis: A global systematic review and meta-analysis.** *J Infect* 2018, **77**(6):469-478.
7. Lonnroth K, Jaramillo E, Williams BG, Dye C, Raviglione M: **Drivers of tuberculosis epidemics: the role of risk factors and social determinants.** *SOC SCI MED/2814* 2009, **68**(12):2240-2246.
8. Mulenga EM, Miller HB, Sinkala T, Hysong TA, Burgess JL: **Silicosis and tuberculosis in Zambian**

- miners. *Int J Occup Environ Health* 2005, **11**(3):259-262.
9. National Collaborating Centre for Chronic Conditions (UK) CfC, Practice at NICE (UK) NifHaCE, Guidance: **Tuberculosis: Clinical Diagnosis and Management of Tuberculosis, and Measures for Its Prevention and Control**. In., edn. London; 2011.
  10. Byrne AL, Marais BJ, Mitnick CD, Lecca L, Marks GB: **Tuberculosis and chronic respiratory disease: a systematic review**. *INT J INFECT DIS/2229* 2015, **32**:138-146.
  11. Jeon CY, Murray MB: **Diabetes mellitus increases the risk of active tuberculosis: a systematic review of 13 observational studies**. *PLOS MED/13585* 2008, **5**(7):e152.
  12. De La Rosa GR, Jacobson KL, Rolston KV, Raad, II, Kontoyiannis DP, Safdar A: **Mycobacterium tuberculosis at a comprehensive cancer centre: active disease in patients with underlying malignancy during 1990-2000**. *Clin Microbiol Infect* 2004, **10**(8):749-752.
  13. Baker MA, Harries AD, Jeon CY, Hart JE, Kapur A, Lonroth K, Ottmani SE, Goonesekera SD, Murray MB: **The impact of diabetes on tuberculosis treatment outcomes: a systematic review**. *BMC MED/8005* 2011, **9**:81.
  14. Samuels JP, Sood A, Campbell JR, Ahmad Khan F, Johnston JC: **Comorbidities and treatment outcomes in multidrug resistant tuberculosis: a systematic review and meta-analysis**. *Sci Rep* 2018, **8**(1):4980.
  15. Crofts JP, Andrews NJ, Barker RD, Delpech V, Abubakar I: **Risk factors for recurrent tuberculosis in England and Wales, 1998-2005**. *THORAX/8121* 2010, **65**(4):310-314.
  16. Gomez-Gomez A, Magana-Aquino M, Lopez-Meza S, Aranda-Alvarez M, Diaz-Ornelas DE, Hernandez-Segura MG, Salazar-Lezama MA, Castellanos-Joya M, Noyola DE: **Diabetes and Other Risk Factors for Multi-drug Resistant Tuberculosis in a Mexican Population with Pulmonary Tuberculosis: Case Control Study**. *ARCH MED RES/2219* 2015, **46**(2):142-148.
  17. Diande S, Sangare L, Kouanda S, Dingtoumda BI, Mourfou A, Ouedraogo F, Sawadogo I, Nebie B, Gueye A, Sawadogo LT *et al*: **Risk factors for multidrug-resistant tuberculosis in four centers in Burkina Faso, West Africa**. *MICROB DRUG RESIST/2529* 2009, **15**(3):217-221.
  18. Zhao Y, Xu S, Wang L, Chin DP, Wang S, Jiang G, Xia H, Zhou Y, Li Q, Ou X *et al*: **National survey of drug-resistant tuberculosis in China**. *N Engl J Med* 2012, **366**(23):2161-2170.
  19. Jing H, Wang H, Wang Y, Deng Y, Li X, Liu Z, Graviss EA, Ma X: **Prevalence of nontuberculous mycobacteria infection, China, 2004-2009**. *EMERG INFECT DIS/6994* 2012, **18**(3):527-528.
  20. Keshavjee S, Farmer PE: **Picking up the pace--scale-up of MDR tuberculosis treatment programs**. *N Engl J Med* 2010, **363**(19):1781-1784.
  21. Shah NS, Pratt R, Armstrong L, Robison V, Castro KG, Cegielski JP: **Extensively drug-resistant tuberculosis in the United States, 1993-2007**. *JAMA* 2008, **300**(18):2153-2160.
  22. van Zyl Smit RN, Pai M, Yew WW, Leung CC, Zumla A, Bateman ED, Dheda K: **Global lung health: the colliding epidemics of tuberculosis, tobacco smoking, HIV and COPD**. *EUR RESPIR J/8332* 2010, **35**(1):27-33.
  23. Martens GW, Arikan MC, Lee J, Ren F, Greiner D, Kornfeld H: **Tuberculosis susceptibility of diabetic mice**. *Am J Respir Cell Mol Biol* 2007, **37**(5):518-524.
  24. Romanowski K, Clark EG, Levin A, Cook VJ, Johnston JC: **Tuberculosis and chronic kidney disease: an emerging global syndemic**. *KIDNEY INT/7683* 2016, **90**(1):34-40.
  25. Bell LCK, Noursadeghi M: **Pathogenesis of HIV-1 and Mycobacterium tuberculosis co-infection**. *NAT REV MICROBIOL/24727* 2018, **16**(2):80-90.
  26. Sethi S, Murphy TF: **Infection in the pathogenesis and course of chronic obstructive**

- 1  
2  
3 **pulmonary disease.** *N Engl J Med* 2008, **359**(22):2355-2365.
- 4  
5 27. Inghammar M, Lofdahl CG, Winqvist N, Ljungberg B, Egesten A, Engstrom G: **Impaired**
- 6 **pulmonary function and the risk of tuberculosis: a population-based cohort study.** *EUR*
- 7 *RESPIR J/8332* 2011, **37**(5):1285-1287.
- 8  
9 28. Workneh MH, Bjune GA, Yimer SA: **Prevalence and associated factors of tuberculosis and**
- 10 **diabetes mellitus comorbidity: A systematic review.** *PLOS ONE/3057* 2017, **12**(4):e0175925.
- 11  
12 29. Lee CH, Lee MC, Shu CC, Lim CS, Wang JY, Lee LN, Chao KM: **Risk factors for pulmonary**
- 13 **tuberculosis in patients with chronic obstructive airway disease in Taiwan: a nationwide**
- 14 **cohort study.** *BMC INFECT DIS/269* 2013, **13**:194.
- 15  
16 30. O'Toole RF, Shukla SD, Walters EH: **TB meets COPD: An emerging global co-morbidity in**
- 17 **human lung disease.** *Tuberculosis (Edinb)* 2015, **95**(6):659-663.
- 18  
19 31. Inghammar M, Ekblom A, Engstrom G, Ljungberg B, Romanus V, Lofdahl CG, Egesten A: **COPD**
- 20 **and the risk of tuberculosis--a population-based cohort study.** *PLOS ONE/3057* 2010,
- 21 **5**(4):e10138.
- 22  
23 32. Lonnroth K, Roglic G, Harries AD: **Improving tuberculosis prevention and care through**
- 24 **addressing the global diabetes epidemic: from evidence to policy and practice.** *Lancet*
- 25 *Diabetes Endocrinol* 2014, **2**(9):730-739.
- 26  
27 33. Fletcher B, Gulanick M, Lamendola C: **Risk factors for type 2 diabetes mellitus.** *J CARDIOVASC*
- 28 *NURS/2172* 2002, **16**(2):17-23.

29 **Figure 1.** TB cases in Shandong, China. DST, drug-susceptibility testing; NTM, *nontuberculous mycobacteria*; PTB,  
30 pulmonary tuberculosis.  
31  
32  
33  
34  
35  
36  
37  
38  
39  
40  
41  
42  
43  
44  
45  
46  
47  
48  
49  
50  
51  
52  
53  
54  
55  
56  
57  
58  
59  
60

**Table 1.** Characteristics of new and retreated PTB patients, Shandong, China, 2004–2019

| Characteristics | New treated PTB (n=9051)     |                     |                                        |           |                                           |           | Retreated PTB (n=1924)       |                    |                                        |           |                                           |           | Total (n=10975)      |
|-----------------|------------------------------|---------------------|----------------------------------------|-----------|-------------------------------------------|-----------|------------------------------|--------------------|----------------------------------------|-----------|-------------------------------------------|-----------|----------------------|
|                 | Susceptible<br>N=7348 (81.2) | DR<br>N=1703 (18.8) | Univariable<br>analysis<br>OR (95% CI) | P value   | Multivariable<br>analysis<br>aOR (95% CI) | P value   | Susceptible<br>N=1420 (73.8) | DR<br>N=504 (26.2) | Univariable<br>analysis<br>OR (95% CI) | P value   | Multivariable<br>analysis<br>aOR (95% CI) | P value   |                      |
| Age             | 50.0±19.9                    | 48.3±19.1           | 0.996 (0.993-0.998)                    | 0.001     | 0.994 (0.991-0.998)                       | 0.001     | 51.0±19.8                    | 48.7±18.6          | 0.994 (0.989-0.999)                    | 0.021     | 0.986 (0.980-0.993)                       | <0.001    | 49.8±19.7            |
| Sex (male)      | 6098/7348<br>(83.0)          | 1460/1703<br>(85.7) |                                        | 0.006     | 1.249 (1.033-1.510)                       | 0.022     | 1155/1420<br>(81.3)          | 417/1420<br>(29.3) | 1.100 (0.842-1.436)                    | 0.485     | 1.202 (0.865-1.670)                       | 0.273     | 9130/10975<br>(83.2) |
| BMI             |                              |                     |                                        |           |                                           |           |                              |                    |                                        |           |                                           |           |                      |
| <18.5           | 1550/6627<br>(23.4)          | 352/1548<br>(22.7)  | 0.949 (0.723-1.247)                    | 0.708     | 0.917 (0.675-1.246)                       | 0.581     | 354/1309<br>(27.0)           | 135/468<br>(28.8)  | 0.554 (0.336-0.911)                    | 0.020     | 0.557 (0.316-0.983)                       | 0.044     | 2391/9952<br>(24.0)  |
| 18.5-24.9       | 4751/6627<br>(71.17)         | 1118/1548<br>(72.2) | 0.984 (0.762-1.270)                    | 0.899     | 0.981 (0.690-1.223)                       | 0.560     | 910/1309<br>(69.5)           | 320/468<br>(68.5)  | 0.482 (0.299-0.775)                    | 0.003     | 0.448 (0.260-0.774)                       | 0.004     | 7081/9952<br>(71.2)  |
| ≥25             | 326/6627 (4.9)               | 78/1548 (5.0)       | Reference                              | Reference | Reference                                 | Reference | 45/1309 (3.4)                | 31/468 (6.6)       | Reference                              | Reference | Reference                                 | Reference | 480/9952 (4.8)       |
| Alcohol abuse   | 1246/5779<br>(21.6)          | 251/1291<br>(19.4)  | 1.139 (0.979-1.325)                    | 0.092     | 0.868 (0.707-1.067)                       | 0.179     | 242/1355<br>(17.9)           | 85/459 (18.5)      | 1.045 (0.795-1.374)                    | 0.751     | 0.820 (0.568-1.185)                       | 0.291     | 1824/8884<br>(20.5)  |
| Smoking         | 1475/5822<br>(25.3)          | 318/1299<br>(24.5)  | 1.047 (0.910-1.204)                    | 0.521     | 1.033 (0.851-1.255)                       | 0.741     | 264/1360<br>(19.4)           | 116/461<br>(25.2)  | 1.396 (1.088-1.792)                    | 0.009     | 1.687 (1.191-2.388)                       | 0.003     | 2173/8942<br>(24.3)  |
| Cavity          | 2765/6201<br>(44.6)          | 689/1452<br>(47.5)  | 0.891 (0.795-0.999)                    | 0.049     | 1.152 (1.012-1.312)                       | 0.033     | 444/1299<br>(34.2)           | 205/442<br>(46.4)  | 1.666 (1.338-2.074)                    | <0.001    | 1.550 (1.219-1.971)                       | <0.001    | 4103/9394<br>(43.7)  |
| Comorbidity     | 1032/7348 (14)               | 246/1703<br>(14.4)  | 1.033 (0.889-1.201)                    | 0.669     | 1.079 (0.901-1.293)                       | 0.408     | 159/1420<br>(11.2)           | 82/504 (16.3)      | 1.541 (1.155-2.056)                    | 0.003     | 1.436 (1.020-2.022)                       | 0.038     | 1519/10975<br>(13.8) |

aOR, adjusted odds ratio; BMI, body mass index; CI, confidence interval; DR, drug-resistant; PTB, pulmonary tuberculosis.

**Table 2.** Demographic and clinical characteristics of 1924 retreated PTB patients.

| Characteristics                 | Total<br>N=1924 | PTB patients with comorbidity<br>N=241 | PTB patients without comorbidity<br>N=1683 | P value   |
|---------------------------------|-----------------|----------------------------------------|--------------------------------------------|-----------|
| Age                             | 50.43±19.53     | 60.05±15.87                            | 49.05±19.62                                | <0.001    |
| 0-14                            | 4 (0.2)         | 0 (0)                                  | 4 (0.2)                                    | 1         |
| 15-44                           | 737 (38.3)      | 42 (17.4)                              | 695 (41.3)                                 | <0.001    |
| 45-64                           | 661 (34.4)      | 99 (41.1)                              | 562 (33.4)                                 | 0.019     |
| >65                             | 522 (27.1)      | 100 (41.5)                             | 422 (25.1)                                 | <0.001    |
| Sex (male)                      | 1572 (81.7)     | 210 (87.1)                             | 1362 (80.9)                                | 0.02      |
| BMI (N=1777/230/1547)           |                 |                                        |                                            |           |
| <18.5                           | 489 (25.4)      | 56 (23.2)                              | 433 (25.7)                                 | reference |
| 18.5-24.9                       | 1212 (63.0)     | 155 (64.3)                             | 1057 (62.8)                                | 0.449     |
| ≥25                             | 76 (4.0)        | 19 (7.9)                               | 57 (3.4)                                   | <0.001    |
| Alcohol abuse (N=1814/233/1581) | 327 (18.0)      | 58 (24.9)                              | 269 (17.0)                                 | 0.003     |
| Smoking (N=1821/233/ 1588)      | 380 (20.9)      | 70 (30.0)                              | 310 (19.5)                                 | <0.001    |
| Symptom                         |                 |                                        |                                            |           |
| Cough                           | 1840 (95.6)     | 226 (93.8)                             | 1614 (95.9)                                | 0.131     |
| Expectoration                   | 1504 (78.3)     | 205 (85.1)                             | 1299 (77.2)                                | 0.006     |
| Fever                           | 901 (46.8)      | 104 (43.2)                             | 797 (47.4)                                 | 0.221     |
| Night sweat                     | 434 (22.6)      | 45 (18.7)                              | 389 (23.1)                                 | 0.123     |
| Fatigue                         | 756 (39.3)      | 90 (37.3)                              | 666 (39.6)                                 | 0.508     |
| Haemoptysis                     | 266 (13.8)      | 53 (22.0)                              | 213 (12.7)                                 | <0.001    |
| Weight loss                     | 274 (14.2)      | 47 (19.5)                              | 227 (13.5)                                 | 0.012     |
| Chest pain                      | 217 (11.3)      | 32 (13.3)                              | 185 (11.0)                                 | 0.294     |
| TB contact (N=720/162/558)      | 29 (4.0)        | 7 (4.3)                                | 22 (3.9)                                   | 0.829     |
| Cavity (N=1741/219/ 1522)       | 649 (37.3)      | 115 (52.5)                             | 534 (35.1)                                 | <0.001    |

BMI, body mass index; PTB, pulmonary tuberculosis.



**Table 3.** Drug-resistant profiles among retreated PTB patients.

| Types                              | Total<br>N=1924 | With comorbidity<br>N=241 | Without comorbidity<br>N=1683 | P value |
|------------------------------------|-----------------|---------------------------|-------------------------------|---------|
| DR-TB                              | 504 (26.2)      | 82 (34.0)                 | 422 (25.1)                    | 0.003   |
| Any resistance to first-line drugs |                 |                           |                               |         |
| INH                                | 324 (16.8)      | 55 (22.8)                 | 269 (16.0)                    | 0.008   |
| RFP                                | 229 (11.9)      | 47 (19.5)                 | 182 (10.8)                    | <0.001  |
| EMB                                | 63 (3.3)        | 12 (5.0)                  | 51 (3.0)                      | 0.112   |
| SM                                 | 325 (16.9)      | 51 (21.2)                 | 274 (16.3)                    | 0.059   |
| Others                             | 227 (11.8)      | 30 (12.4)                 | 197 (11.7)                    | 0.738   |
| Mono-resistant tuberculosis        | 85 (4.4)        | 10 (4.1)                  | 75 (4.5)                      | 0.828   |
| INH                                | 32 (1.7)        | 9 (3.7)                   | 23 (1.4)                      | 0.007   |
| RFP                                | 7 (0.4)         | 1 (0.4)                   | 6 (0.4)                       | 1       |
| EMB                                | 98 (5.1)        | 9 (3.7)                   | 89 (5.3)                      | 0.305   |
| SM                                 | 5 (0.3)         | 1 (0.4)                   | 4 (0.2)                       | 0.488   |
| Others                             | 117 (6.1)       | 21 (8.7)                  | 96 (5.7)                      | 0.067   |
| Polydrug resistant tuberculosis    | 1 (0.1)         | 1 (0.4)                   | 0 (0)                         | 0.125   |
| INH + EMB                          | 72 (3.7)        | 10 (4.1)                  | 62 (3.7)                      | 0.722   |
| INH + SM                           | 4 (0.2)         | 1 (0.4)                   | 3 (0.2)                       | 0.415   |
| RFP + EMB                          | 28 (1.5)        | 6 (2.5)                   | 22 (1.3)                      | 0.151   |
| RFP + SM                           | 6 (0.3)         | 3 (1.2)                   | 3 (0.2)                       | 0.029   |
| INH + EMB + SM                     | 6 (0.3)         | 0 (0)                     | 6 (0.4)                       | 1       |
| MDR-TB (Total)                     | 160 (8.3)       | 31 (12.9)                 | 129 (7.7)                     | 0.006   |
| INH + RFP                          | 36 (1.9)        | 7 (2.9)                   | 29 (1.7)                      | 0.206   |
| INH + RFP + EMB                    | 7 (0.4)         | 1 (0.4)                   | 6 (0.4)                       | 1       |
| INH + RFP + EMB + SM               | 28 (1.5)        | 5 (2.1)                   | 23 (1.4)                      | 0.391   |

|                |          |          |          |       |
|----------------|----------|----------|----------|-------|
| INH + RFP + SM | 77 (4.0) | 16 (6.6) | 61 (3.6) | 0.026 |
| others         | 12 (0.6) | 2 (0.8)  | 10 (0.6) | 0.655 |

DR, drug-resistant; EMB, ethambutol; INH, isoniazid; MDR, multidrug-resistant; PTB, pulmonary tuberculosis; RFP, rifampicin; SM, streptomycin; TB, tuberculosis.

**Table 4.** Comorbidities detected among retreated PTB patients.

| Comorbidity             | INH<br>N=324 | RFP<br>N=229 | MDR<br>N=160 | DR<br>N=504 | Susceptible<br>N=1420 | Total<br>N=1924 |
|-------------------------|--------------|--------------|--------------|-------------|-----------------------|-----------------|
| Extra-pulmonary disease | 47 (14.5)    | 41 (17.9)    | 28 (17.5)    | 69 (13.7)   | 118 (8.3)             | 187 (9.7)       |
| DM                      | 30 (9.3)     | 32 (14.0)    | 21 (13.1)    | 48 (9.5)    | 76 (5.4)              | 124 (6.4)       |
| Hypertension            | 7 (2.2)      | 2 (0.9)      | 1 (0.6)      | 10 (2.0)    | 19 (1.3)              | 29 (1.5)        |
| Gastrointestinal cancer | 1 (0.3)      | 0 (0)        | 0 (0)        | 1 (0.2)     | 4 (0.3)               | 5 (0.3)         |
| Hepatitis               | 4 (1.2)      | 2 (0.9)      | 2 (1.3)      | 4 (0.8)     | 12 (0.9)              | 16 (0.8)        |
| CRF                     | 0 (0)        | 0 (0)        | 0 (0)        | 0 (0)       | 1 (0.1)               | 1 (0.1)         |
| CTD                     | 2 (0.6)      | 1 (0.4)      | 1 (0.6)      | 2 (0.4)     | 2 (0.1)               | 4 (0.2)         |
| Malignancy              | 2 (0.6)      | 0 (0)        | 0 (0)        | 3 (0.6)     | 16 (1.1)              | 19 (1.0)        |
| Disability              | 1 (0.3)      | 0 (0)        | 0 (0)        | 1 (0.2)     | 5 (0.4)               | 6 (0.3)         |
| HIV infection           | 1 (0.3)      | 3 (1.3)      | 1 (0.6)      | 3 (0.6)     | 0 (0)                 | 3 (0.2)         |
| Pulmonary disease       | 11 (3.4)     | 9 (3.9)      | 5 (3.1)      | 17 (3.4)    | 49 (3.5)              | 66 (3.4)        |
| Silicosis               | 1 (0.3)      | 1 (0.4)      | 0 (0)        | 3 (0.6)     | 3 (0.2)               | 6 (0.3)         |
| Asthma                  | 1 (0.3)      | 0 (0)        | 0 (0)        | 1 (0.2)     | 10 (0.7)              | 11 (0.6)        |
| COPD                    | 6 (1.9)      | 7 (3.06)     | 4 (2.5)      | 9 (1.8)     | 31 (2.2)              | 40 (2.1)        |
| Bronchiectasia          | 4 (1.2)      | 1 (0.4)      | 1 (0.6)      | 4 (0.8)     | 8 (0.6)               | 12 (0.6)        |
| Lung cancer             | 0 (0)        | 0 (0)        | 0 (0)        | 1 (0.2)     | 4 (0.3)               | 5 (0.3)         |
| Others                  | 1 (0.3)      | 0 (0)        | 0 (0)        | 2 (0.4)     | 2 (0.1)               | 4 (0.2)         |
| Number of comorbidities | 55 (17.0)    | 47 (20.5)    | 31 (19.4)    | 82 (16.3)   | 159 (11.2)            | 241 (12.5)      |
| 1                       | 48 (14.8)    | 44 (19.2)    | 29 (18.1)    | 72 (14.3)   | 132 (9.3)             | 204 (10.6)      |
| 2                       | 6 (1.9)      | 2 (0.9)      | 2 (1.3)      | 8 (1.6)     | 21 (1.5)              | 29 (1.5)        |

1  
2  
3  
4  
5  
6  
7  
8  
9  
10  
11  
12  
13  
14  
15  
16  
17  
18  
19  
20  
21  
22  
23  
24  
25  
26  
27  
28  
29  
30  
31  
32  
33  
34  
35  
36  
37  
38  
39  
40  
41  
42  
43  
44  
45  
46

|                          |           |           |           |           |           |           |
|--------------------------|-----------|-----------|-----------|-----------|-----------|-----------|
| ≥3                       | 1 (0.3)   | 1 (0.4)   | 0 (0)     | 2 (0.4)   | 6 (0.4)   | 8 (0.4)   |
| Pulmonary alone          | 8 (2.5)   | 6 (2.6)   | 3 (1.9)   | 13 (2.6)  | 41 (2.9)  | 54 (2.8)  |
| Extra-pulmonary alone    | 44 (13.6) | 38 (16.6) | 26 (16.3) | 65 (12.9) | 110 (7.8) | 175 (9.1) |
| Pulmonary+extrapulmonary | 3 (0.9)   | 3 (1.3)   | 2 (1.3)   | 4 (0.8)   | 8 (0.6)   | 12 (0.6)  |

COPD, chronic obstructive pulmonary disease; CRF, chronic renal failure; CTD, connective tissue disease; DM, diabetes mellitus; HIV, human immunodeficiency virus; PTB, pulmonary tuberculosis.

**Table 5.** Association between comorbidity and anti-tuberculosis drug resistance among retreated PTB patients.

| Type                               | Univariable         |           | Multivariable       |           |
|------------------------------------|---------------------|-----------|---------------------|-----------|
|                                    | OR (95%CI)          | p value   | aOR (95%CI)         | p value   |
| DR-TB                              | 1.541 (1.155-2.056) | 0.003     | 1.436 (1.020-2.022) | 0.038     |
| Any resistance to first-line drugs |                     |           |                     |           |
| INH                                | 1.622 (1.162-2.264) | 0.005     | 1.488 (0.997-2.221) | 0.052     |
| RFP                                | 2.048 (1.428-2.937) | <0.001    | 2.173 (1.408-3.355) | <0.001    |
| EMB                                | 1.866 (0.974-3.575) | 0.06      | 1.643 (0.712-3.790) | 0.244     |
| SM                                 | 1.476 (1.049-2.077) | 0.025     | 1.511 (1.004-2.272) | 0.048     |
| Mono-resistant tuberculosis        | 1.208 (0.795-1.835) | 0.376     | 1.144 (0.703-1.861) | 0.587     |
| Polydrug resistant tuberculosis    | 1.735 (1.052-2.861) | 0.031     | 1.546 (0.811-2.944) | 0.185     |
| MDR-TB                             | 1.906 (1.246-2.916) | 0.003     | 1.956 (1.171-3.265) | 0.01      |
| Pan susceptible                    | reference           | reference | reference           | reference |

aOR, adjusted odds ratio; CI, confidence interval; DR, drug-resistant; EMB, ethambutol; INH, isoniazid; MDR, multidrug-resistant; OR, odds ratio; PTB, pulmonary tuberculosis; RFP, rifampicin; SM, streptomycin; TB, tuberculosis.

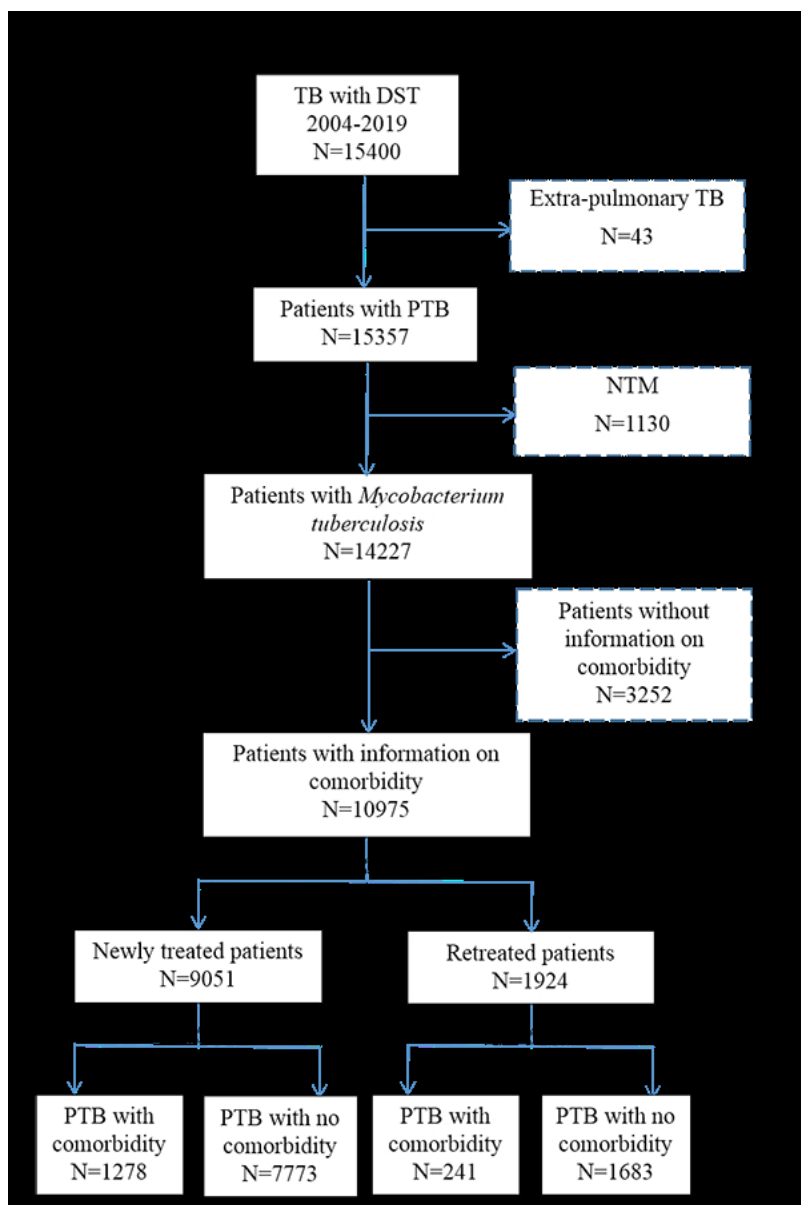

Figure 1. TB cases in Shandong, China. DST, drug-susceptibility testing; NTM, nontuberculous mycobacteria; PTB, pulmonary tuberculosis.

51x76mm (300 x 300 DPI)

# BMJ Open

**The risk factors of drug resistant tuberculosis, the association between comorbidity status and drug resistant patterns: a retrospective study from previously treated pulmonary tuberculosis in Shandong, China, during 2004-2019**

|                                 |                                                                                                                                                                                                                                                                                                                                                                                                                                                                                                                                          |
|---------------------------------|------------------------------------------------------------------------------------------------------------------------------------------------------------------------------------------------------------------------------------------------------------------------------------------------------------------------------------------------------------------------------------------------------------------------------------------------------------------------------------------------------------------------------------------|
| Journal:                        | <i>BMJ Open</i>                                                                                                                                                                                                                                                                                                                                                                                                                                                                                                                          |
| Manuscript ID                   | bmjopen-2020-044349.R1                                                                                                                                                                                                                                                                                                                                                                                                                                                                                                                   |
| Article Type:                   | Original research                                                                                                                                                                                                                                                                                                                                                                                                                                                                                                                        |
| Date Submitted by the Author:   | 28-Dec-2020                                                                                                                                                                                                                                                                                                                                                                                                                                                                                                                              |
| Complete List of Authors:       | Tao, Ning; Shandong Provincial Hospital, Department of Respiratory and Critical Care Medicine<br>Li, Yi-fan ; Shandong Provincial Hospital<br>Song, Wan-mei ; Shandong Provincial Hospital<br>Liu, Jin-yue ; Shandong Provincial Third Hospital<br>Zhang, Qian-yun ; Shandong Provincial Hospital<br>Xu, Ting-ting ; Shandong Provincial Hospital<br>Li, Shi-jin ; Shandong Provincial Hospital<br>An, Qi-qi ; Shandong Provincial Hospital<br>Liu, Si-qi ; Shandong Provincial Hospital<br>Li, Huai-chen ; Shandong Provincial Hospital |
| <b>Primary Subject Heading</b>: | Epidemiology                                                                                                                                                                                                                                                                                                                                                                                                                                                                                                                             |
| Secondary Subject Heading:      | Infectious diseases, Public health, Respiratory medicine                                                                                                                                                                                                                                                                                                                                                                                                                                                                                 |
| Keywords:                       | EPIDEMIOLOGY, INFECTIOUS DISEASES, Public health < INFECTIOUS DISEASES, Tuberculosis < INFECTIOUS DISEASES                                                                                                                                                                                                                                                                                                                                                                                                                               |
|                                 |                                                                                                                                                                                                                                                                                                                                                                                                                                                                                                                                          |

SCHOLARONE™  
Manuscripts



I, the Submitting Author has the right to grant and does grant on behalf of all authors of the Work (as defined in the below author licence), an exclusive licence and/or a non-exclusive licence for contributions from authors who are: i) UK Crown employees; ii) where BMJ has agreed a CC-BY licence shall apply, and/or iii) in accordance with the terms applicable for US Federal Government officers or employees acting as part of their official duties; on a worldwide, perpetual, irrevocable, royalty-free basis to BMJ Publishing Group Ltd ("BMJ") its licensees and where the relevant Journal is co-owned by BMJ to the co-owners of the Journal, to publish the Work in this journal and any other BMJ products and to exploit all rights, as set out in our [licence](#).

The Submitting Author accepts and understands that any supply made under these terms is made by BMJ to the Submitting Author unless you are acting as an employee on behalf of your employer or a postgraduate student of an affiliated institution which is paying any applicable article publishing charge ("APC") for Open Access articles. Where the Submitting Author wishes to make the Work available on an Open Access basis (and intends to pay the relevant APC), the terms of reuse of such Open Access shall be governed by a Creative Commons licence – details of these licences and which [Creative Commons](#) licence will apply to this Work are set out in our licence referred to above.

Other than as permitted in any relevant BMJ Author's Self Archiving Policies, I confirm this Work has not been accepted for publication elsewhere, is not being considered for publication elsewhere and does not duplicate material already published. I confirm all authors consent to publication of this Work and authorise the granting of this licence.

1 **The risk factors of drug resistant tuberculosis, the association between**  
2 **comorbidity status and drug resistant patterns: a retrospective study**  
3 **from previously treated pulmonary tuberculosis in Shandong, China,**  
4 **during 2004-2019**

5 Ning-ning Tao<sup>1\*</sup>, Yi-fan Li<sup>1\*</sup>, Wan-mei Song<sup>1,2</sup>, Jin-yue Liu<sup>3</sup>, Qian-yun Zhang<sup>1,2</sup>, Ting-  
6 ting Xu<sup>1</sup>, Shi-jin Li<sup>1,2</sup>, Qi-qi An<sup>1,2</sup>, Si-qi Liu<sup>1,2</sup>, Huai-chen Li<sup>1,4#</sup>

7 Affiliations:

8 1. Department of Respiratory and Critical Care Medicine, Shandong Provincial  
9 Hospital Affiliated to Shandong University, Shandong Provincial Hospital Affiliated to  
10 Shandong First Medical University, 250021 Jinan, Shandong, People's Republic of  
11 China.

12 2. Cheeloo College of Medicine, Shandong University, 250012 Jinan, Shandong,  
13 People's Republic of China.

14 3. Department of Intensive Care Unit, Shandong Provincial Third Hospital, 100191  
15 Jinan, Shandong, People's Republic of China.

16 4. College of Traditional Chinese Medicine, Shandong University of Traditional  
17 Chinese Medicine, 250355 Jinan, Shandong, People's Republic of China.

18 \* Ning-ning Tao and Yi-fan Li contributed equally to this work.

19 #Address for correspondence:

20 Huai-chen Li (<sup>1</sup>Department of Respiratory and Critical Care Medicine, Shandong  
21 Provincial Hospital Affiliated to Shandong University, Shandong Provincial Hospital  
22 Affiliated to Shandong First Medical University, 324 Jingwuweiqi Road, Huaiyin

1  
2  
3  
4 23 District, Jinan 250021, Shandong, People's Republic of China; <sup>4</sup>Department of Chinese  
5  
6 24 Medicine Integrated with Western Medicine, College of Traditional Chinese Medicine,  
7  
8  
9 25 Shandong University of Traditional Chinese Medicine, 16369 Jingshi Road, Lixia  
10  
11 26 District, Jinan 250355, Shandong, People's Republic of China; Tel +86-13031737646  
12  
13  
14 27 Email lihuaichen@163.com)

16  
17 **Abstract:**

18  
19 **Objectives:** This study was designed to identify the risk factors of drug  
20  
21  
22 30 resistant tuberculosis (DR-TB), the association of comorbidity and drug-  
23  
24  
25 31 resistance among retreated pulmonary tuberculosis (PTB).

26  
27 **Design:** A retrospective study was conducted among all the 36 monitoring  
28  
29  
30 33 sites in Shandong, China, over a 16-year period. Baseline characteristics  
31  
32  
33 34 were collected from TB Surveillance System. Categorical variables were  
34  
35  
36 35 compared by Fisher's exact or Pearson Chi-square test. The risk factors of  
37  
38  
39 36 DR were identified using univariable analysis and multivariable logistic  
40  
41  
42 37 models. The influences of comorbidity on different DR types were  
43  
44  
45 38 evaluated by performing multivariable logistic models with the covariates  
46  
47  
48 39 adjusted by age, sex, body mass index, drinking/smoking history, and  
49  
50  
51 40 cavity.

52  
53 **Results:** A total of 10,975 PTB patients were recorded during 2004-2019.  
54  
55  
56 42 Finally 1,924 retreated PTB were included. Among retreated PTB, 26.2%  
57  
58  
59 43 were DR-TB, 12.5% had comorbidity. Smoking (adjusted odds ratio (aOR):  
60  
44 1.69, 95% confidence interval (CI): 1.19-2.39), cavity (aOR: 1.55, 95%CI:



1  
2  
3  
4 1.22-1.97), comorbidity (aOR: 1.44, 95%CI: 1.02-2.02) were risk factors  
5  
6 for DR-TB. Of 504 DR-TB, 9.5% had diabetes mellitus (DM), followed by  
7  
8 hypertension 2.0% and chronic obstructive pulmonary disease (COPD)  
9  
10 1.8%. Retreated PTB with comorbidity were more likely to be older, to  
11  
12 have more bad habits (smoking, alcohol abuse) and clinical symptoms  
13  
14 (expectoration, hemoptysis, weight loss). Comorbidity was significantly  
15  
16 associated with DR-TB (aOR: 1.44, 95%CI: 1.02-2.02), overall rifampin  
17  
18 (RFP) resistance (aOR: 2.17, 95%CI: 1.41-3.36), overall streptomycin (SM)  
19  
20 resistance (aOR: 1.51, 95%CI: 1.00-2.27), and multidrug resistance (MDR)  
21  
22 (aOR: 1.96, 95%CI: 1.17-3.27) compared with pan-susceptible patients  
23  
24 (P<0.05).  
25  
26  
27  
28  
29  
30  
31

32 **Conclusion:** Smoking, cavity, and comorbidity lead to an increased risk of  
33  
34 DR among retreated PTB. The strategies to improve host health including  
35  
36 smoking cessation, screening and treatment of comorbidity might  
37  
38 contribute to the control of TB, especially DR-TB in China.  
39  
40  
41  
42

#### 43 **Strengths and limitations of this study:**

44  
45 This study had a large sample size and long time span.  
46  
47

48 The sample on the association between comorbidity status and DR-TB  
49  
50 among retreated PTB patients in Shandong province, China is  
51  
52 representative.  
53  
54

55 The diversities in diagnostic and therapeutic level from different TB  
56  
57 monitoring sites may lead to bias.  
58  
59  
60

1  
2  
3  
4 67 The diagnosis of TB based on microscopy inevitably underestimated the  
5  
6 68 burden of TB.

7  
8  
9 69 **Keywords:** drug resistance, retreated pulmonary tuberculosis, comorbidity,  
10  
11 70 risk factor

12  
13  
14 71 **Introduction:**

15  
16  
17 72 With the changing of demographic and lifestyle, the spectrum of disease  
18  
19 73 has been transformed from infectious diseases to noncommunicable  
20  
21 74 diseases (NCDs) [1]. However, people from developing country suffered  
22  
23 75 from double burden of infectious diseases and NCDs [2]. As an infectious  
24  
25 76 disease, tuberculosis (TB) can be prevented and well treated. Although the  
26  
27 77 control of TB achieved considerable progress in the past decades, the work  
28  
29 78 seems to reach its bottleneck recently with 1.45 million death caused by  
30  
31 79 TB which ranks the topmost cause of death among infectious agents [3].  
32  
33 80 The overlapping TB and comorbidities amplify the risk and mortality of  
34  
35 81 the other [1]. Bidirectional deleterious correlation between TB and  
36  
37 82 coexisting disease might open up a new direction for future TB control.

38  
39  
40 83 Drug-resistance is a intractable public problem and a crucial obstacle to  
41  
42 84 the control of TB. According to the 2019 global TB report, about 1/2  
43  
44 85 million new cases were rifampicin resistant TB (RR-TB), among which 78%  
45  
46 86 cases were multidrug-resistant TB (MDR-TB), a kind of resistance to both  
47  
48 87 isoniazid (INH) and rifampicin (RFP). Drug-resistance not only was an  
49  
50 88 indicator of poor outcomes, it also resulted in fewer effective drugs to  
51  
52  
53  
54  
55  
56  
57  
58  
59  
60

1  
2  
3  
4 89 choose, higher expenses to pay, the spreading and amplifying of DR-TB  
5  
6 90 [4, 5]. Patients with previously anti-TB treatment history were at high risk  
7  
8  
9 91 to develop DR-TB. Compared with newly treated TB cases (3.4%), the rate  
10  
11 92 of MDR/RR-TB were 18% among retreated cases [3]. The control of DR-  
12  
13  
14 93 TB especially those among retreated patients are imperative.

15  
16  
17 94 Various studies and reviews reported that host factors including smoking,  
18  
19 95 alcohol abuse, low body mass index (BMI), comorbidity (e.g. HIV  
20  
21  
22 96 infection; diabetes mellitus, DM; chronic renal failure, CRF; malignancy,  
23  
24  
25 97 chronic obstructive pulmonary disease, COPD; silicosis) can predispose to  
26  
27 98 the development of TB [6-12]. Several of those factors were associated  
28  
29  
30 99 with poor treatment outcomes (e.g. alcohol abuse, HIV infection, DM) [13,  
31  
32  
33 100 14], TB relapse (e.g. HIV infection, DM) [13, 15] and the development of  
34  
35  
36 101 MDR-TB (e.g. alcohol abuse, HIV infection, DM, COPD) significantly [6,  
37  
38  
39 102 16, 17]. Coexisting disease are continuously being identified as a vital  
40  
41  
42 103 factor for the control of TB. It's believed that the improvement of host  
43  
44  
45 104 health status both timely identification and effective treatment of  
46  
47  
48 105 comorbidity may alleviate the development of TB and decrease the spread  
49  
50  
51 106 of DR-TB.

52  
53  
54 107 Although China is a upper middle income country with half population  
55  
56  
57 108 resided in urban area, the burden of DR-TB (only followed behind India)  
58  
59  
60 109 and NCDs are very serious. This study aims to summarize the  
110 110 characteristics of host status, DR types of retreated pulmonary TB (PTB),

1  
2  
3  
4 111 to identify the risk factor for drug-resistance of these patients, and to  
5  
6 112 evaluate the contribution of comorbidity to different DR types among  
7  
8  
9 113 retreated PTB in Shandong Province, China, during 2004-2019.  
10

## 11 114 **Methods:**

### 12 115 **Ethics statement**

13  
14  
15  
16  
17 116 Ethical approvals of this study were obtained from the Ethics Committee  
18  
19  
20 117 of Shandong Provincial Hospital, affiliated with Shandong University,  
21  
22 118 Shandong, China. Before analysis and reporting, patient records were  
23  
24  
25 119 anonymized and de-identified. The Ethics Committee waived the necessity  
26  
27 120 of informed consent because the retrospective nature of this study.  
28  
29

### 30 121 **Setting**

31  
32  
33 122 This retrospective cohort study was conducted in the second most  
34  
35 123 populous province of China, Shandong province. In 2019, about 100.47  
36  
37 124 million populations resided in an area of 157,100 km<sup>2</sup> in Shandong  
38  
39 125 province, which located at 36°24'N latitude 118°24'E longitude with 17  
40  
41  
42 126 municipalities and 137 counties (districts) (<http://www.stats-sd.gov.cn/>).  
43  
44

### 45 127 **Study population and data collection**

46  
47  
48 128 In Shandong province, there are 13 municipal-level local health  
49  
50  
51 129 departments, two province-level and 21 county-level hospitals which were  
52  
53 130 responsible for the quality assessment in surveillance of TB. We searched  
54  
55  
56 131 the TB Surveillance System in Shandong and collected information for  
57  
58 132 PTB patients with full data on comorbidity status and drug-susceptibility  
59  
60

1  
2  
3  
4 133 testing (DST) results (at least for all the four first-line anti-TB drugs)  
5  
6 134 during 2004-2019. We ruled out those patients who without information  
7  
8  
9 135 on comorbidity status, with extra-pulmonary TB or *Nontuberculosis*  
10  
11 136 *mycobacteria* (NTM) infection (Fig. 1). A total of 9,051 newly treated and  
12  
13  
14 137 1,924 retreated PTB cases were detected. Of all the retreated PTB patients  
15  
16  
17 138 with *mycobacterium tuberculosis* (MTB) infection, 1,683 had no  
18  
19  
20 139 comorbidity, and 241 had at least one comorbidity. Demographic  
21  
22 140 information (age, sex) and clinical information (BMI, smoking, alcohol  
23  
24  
25 141 abuse, cavity, and symptoms) were collected.

#### 142 **Laboratory diagnosis and drug susceptibility testing**

143 All samples available from suspicious patients were collected by  
144 specialist at each surveillance site. One patient should offer at least two  
145 sputum samples for the examinations of bacteriologic culture, species  
146 identification, and DST. The smear microscopy with ZiehlNeelsen staining  
147 was performed to identify acid-fast bacilli. Each sample was inoculated  
148 into tubes with acidified Löwenstein-Jensen medium for further culture  
149 [18]. Subsequently, the samples with growing colonies were tested for  
150 strain identification and DST. The identification of *M. tuberculosis* were  
151 comprehensive considerations of results according to p-nitrobenzoic acid,  
152 2-thiophene carboxylic acid hydrazide testing and 16S rRNA gene  
153 sequence analysis [19].

154 DST for first-line anti-TB drugs was performed using the proportion

1  
2  
3  
4 155 method on Löwenstein-Jensen medium with the following drug  
5  
6 156 concentrations: INH (0.2 µg/mL), RFP (40 µg/mL), ethambutol (EMB, 2.0  
7  
8 µg /mL), and streptomycin ( SM, 4.0 µg/mL). DST for other anti-TB drugs  
9  
10 157 such as pyrazinamide, fluoroquinolone, and kanamycin was performed  
11  
12 158 according to the patients' option which was non-routinely.  
13  
14 159

### 160 **Quality Control**

161 All procedures during TB surveillance were carried out according to  
162 WHO guidelines. External quality assessment (EQA) for all laboratory  
163 tests including smear, culture, and DST was supervised by Superior TB  
164 National Reference laboratory in Katharine Hsu Center of Shandong  
165 Province [18]. The quality assessment and data extraction were  
166 accomplished by at least two researchers who were trained professionally.

### 167 **Definitions**

168 Drug-susceptible TB defined as susceptible to all the four first-line anti-  
169 TB drugs. DR-TB were classified into mono-resistance (MR), only  
170 resistant to one first-line anti-TB drug; multidrug resistance (MDR), at  
171 least resistant to both INH and RFP; polydrug resistance (PDR), resistant  
172 to at least two first-line anti-TB drug, except to both INH and RFP.  
173 Retreated TB referred to the patients who had accepted 1 month of anti-TB  
174 drugs before.

175 The comorbidity information collected in this study were DM,  
176 hypertension, hepatitis, CRF, connective tissue disease (CTD), disability,

1  
2  
3  
4 177 malignancy, HIV infection, silicosis, asthma, COPD, and bronchiectasia  
5  
6 178 co-occurring with TB. The confirmation of comorbidity status mainly from  
7  
8  
9 179 two ways: 1) self-reported by the patient with a previously diagnosis  
10  
11  
12 180 certificate; 2) new identified cases according to associated diagnostic  
13  
14  
15 181 consensus unified globally.

## 17 182 **Statistical analysis**

18  
19 183 Continuous variables such as age were summarized with mean and  
20  
21  
22 184 standard deviation (SD); categorical variables including sex, BMI (<18.5,  
23  
24  
25 185 18.5-24.9,  $\geq 25$ ), drinking history, smoking history, TB contact history,  
26  
27  
28 186 cavity, symptoms (cough, expectoration, fever, night sweating, fatigue,  
29  
30  
31 187 haemoptysis, weight loss, and chest pain), comorbidities (silicosis, asthma,  
32  
33  
34 188 COPD, bronchiectasia, lung cancer, DM, hypertension, gastrointestinal  
35  
36  
37 189 cancer, hepatitis, renal failure, CTD, other malignancy) were summarized  
38  
39  
40 190 as proportions. Univariable analysis and multivariable logistic models  
41  
42  
43 191 were applied to identify the risk factors of drug-resistance among newly  
44  
45  
46 192 treated or retreated PTB cases. Demographic characteristics, clinical traits  
47  
48  
49 193 and DR types were compared according to the comorbidity status using  
50  
51  
52 194 Fisher's exact or Pearson  $\chi^2$  test. Multivariable logistic models were also  
53  
54  
55 195 used to estimate the influence of comorbidity on different DR types with  
56  
57  
58 196 the covariates adjusted by age, sex, BMI, drinking history, smoking history,  
59  
60 197 and cavity according to published researches. A two-sided  $P < 0.05$  was  
198 considered to be significant. All statistical analyses were calculated by

199 using SPSS software, version 20.0.

## 200 **Results:**

### 201 **Case estimates and risk factors of DR-TB**

202 Baseline characteristics of the study populations were demonstrated in  
203 Table 1. A total of 10,975 PTB patients aged  $49.8 \pm 19.7$  were reported in  
204 Shandong, China, 2004-2019, of which 9,051 (82.5%) cases were newly  
205 treated and 1,924 (17.5%) cases were retreated PTB. Among these  
206 retreated PTB cases, 26.2% were DR cases, 82.7% males, 18.5% drinker,  
207 25.2% smoker, 46.4% with baseline cavity and 16.3% had comorbidity.

208 Of all retreated PTB cases, the following characteristics were  
209 associated with the presence of DR-TB: 1) smoking (adjusted odds ratio  
210 (aOR): 1.69, 95% confidence interval (CI): 1.19-2.39); 2) had cavity (aOR:  
211 1.55, 95%CI: 1.22-1.97); 3) had comorbidity (aOR: 1.44, 95%CI: 1.02-  
212 2.02). Of all newly treated PTB cases, male sex (aOR: 1.25, 95%CI: 1.03-  
213 1.51) and cavity (aOR: 1.15, 95%CI: 1.01-1.31) were associated with the  
214 presence of DR-TB.

### 215 **Demographic and clinical characteristics of retreated PTB**

216 A total of 241 (12.5%) retreated PTB patients with comorbidity (Group  
217 A, A) and 1,683 (87.5%) with no comorbidity (Group B, B) were enrolled  
218 in this study. According to Pearson  $\chi^2$  test, retreated PTB patients with  
219 comorbidity were more likely than those without comorbidity to be older  
220 (A vs B:  $60.1 \pm 15.9$  vs  $49.1 \pm 19.6$ ,  $p < 0.001$ ), to be male (A vs B: 87.1% vs



1  
2  
3  
4 221 80.9%,  $p < 0.001$ ), with BMI  $\geq 25$  (A vs B: 7.9% vs 3.4%,  $p = 0.02$ ), to  
5  
6 222 abuse alcohol (A vs B: 24.9% vs 17.0%,  $p = 0.003$ ), to be smoker (A vs B:  
7  
8 223 30.0% vs 19.5%,  $p < 0.001$ ), to had cavity (A vs B: 52.5% vs 35.1%,  $p <$   
9  
10 224 0.001), and to had more symptoms including expectoration (A vs B: 85.1%  
11  
12 225 vs 77.2%,  $p = 0.006$ ), hemoptysis (A vs B: 22.0% vs 12.7%,  $p < 0.001$ ),  
13  
14 226 and weight loss (A vs B: 19.5% vs 13.5%,  $p = 0.012$ ). (Table 2)

### 227 **Drug-resistant profiles of retreated PTB**

228 About 34.0% (82) retreated PTB patients with comorbidity and 25.1%  
229 (422) without comorbidity were DR-TB,  $P = 0.003$ . After further dividing  
230 into different DR subgroups, it showed that the rate of overall INH  
231 resistance (A vs B: 22.8% vs 16.0%,  $p = 0.008$ ), overall RFP resistance (A  
232 vs B: 19.5% vs 10.8%,  $p < 0.001$ ), MR to INH (A vs B: 3.7% vs 1.4%,  $p =$   
233 0.007), PDR to RFP+SM (A vs B: 1.2% vs 0.2%,  $p = 0.029$ ), MDR (A vs  
234 B: 12.9% vs 7.7%,  $p = 0.006$ ), and resistance to INH + RFP + SM (A vs B:  
235 6.6% vs 3.6%,  $p = 0.026$ ) were much higher in group A than group B. No  
236 significant differences on the rates of other DR subgroups between group  
237 A and group B were identified ( $p > 0.05$ ). (Table 3)

### 238 **Comorbidities detected among retreated PTB**

239 Among 241 (12.5%) retreated PTB patients with comorbidity, extra-  
240 pulmonary comorbidity accounted for 77.6% (187), pulmonary  
241 comorbidity 27.4% (66), both pulmonary and extra-pulmonary  
242 comorbidity 5.0% (12), DM 51.5% (124), COPD 16.6% (40). Among 504

1  
2  
3  
4 243 retreated PTB patients with drug-resistance, 16.3% had comorbidity, 13.7%  
5  
6  
7 244 had extra-pulmonary comorbidity, and 3.4% had pulmonary comorbidity.  
8  
9 245 The highest proportion of comorbidity was found for DM (9.5%), followed  
10  
11  
12 246 by hypertension (2.0%), and COPD (1.8%). Of 82 retreated PTB patients  
13  
14  
15 247 with DR and baseline comorbidity, 87.8% (72) had only one kind  
16  
17 248 comorbidity, 15.9% (13) had pulmonary comorbidity alone, 79.3% (65)  
18  
19  
20 249 had extra-pulmonary comorbidity alone, and 4.9% (4) had both pulmonary  
21  
22  
23 250 and extra-pulmonary comorbidity. (Table 4)

### 251 **Association between comorbidity status and DR profiles of retreated** 252 **PTB**

253 According to the univariable analysis and multivariable analysis, overall  
254 RFP resistance (OR: 2.05, 95%CI: 1.43-2.94; aOR:2.17, 95%CI: 1.41-  
255 3.36), overall SM resistance (OR: 1.48, 95%CI: 1.05-2.08; aOR:1.51,  
256 95%CI: 1.00-2.27), and MDR (OR: 1.91, 95%CI: 1.25-2.92; aOR:1.96,  
257 95%CI: 1.17–3.27) had a significant association with comorbidity,  $P < 0.05$ .  
258 Comorbidity was significantly associated with overall INH (OR:1.62,  
259 95%CI: 1.16-2.26) and PDR (OR:1.74, 95%CI: 1.05-2.87) in univariable  
260 analysis,  $P < 0.05$ , but not in multivariable analysis,  $P > 0.05$ . (Table 5)

### 261 **Discussion:**

262 This retrospective cohort study of PTB patients in Shandong province of  
263 China illustrates the risk factors of retreated PTB and the association  
264 between comorbidity status and DR profiles among these patients during

1  
2  
3  
4 265 the past 16-years. This study achieves several findings including: 1) among  
5  
6 266 1924 retreated PTB cases, 26.2% were DR-TB, 12.5% had comorbidity; 2)  
7  
8  
9 267 smoking/cavity/comorbidity were risk factors for DR among retreated PTB;  
10  
11  
12 268 3) among 241 retreated PTB patients with comorbidity, DM had the  
13  
14 269 highest percentage (51.5%), followed by COPD (16.6%); 4) retreated PTB  
15  
16 270 with comorbidity were more likely to be male, to be older, with BMI  $\geq 25$ ,  
17  
18 271 to abuse cigarette/alcohol, to have clinical symptoms (expectoration,  
19  
20 272 hemoptysis, weight loss), and to be DR-TB; 5) with comorbidity also was  
21  
22  
23 273 a risk factor for overall RFP resistance, overall SM resistance, and MDR  
24  
25 274 of retreated PTB.

26  
27  
28  
29  
30 275 Previous findings on the risk factors of DR-TB may vary in ethnicity,  
31  
32 276 geographic region, and study design. In this study, smoking, cavity and  
33  
34 277 comorbidity were risk factors for DR among retreated PTB patients.  
35  
36 278 Similarly, these factors have been reported to increased the risk of DR-TB  
37  
38 279 [17, 20-22]. Having TB treatment history was acknowledged as the  
39  
40 280 strongest and most crucial determinant of DR-TB. While the majority  
41  
42 281 studies indicated that comorbidity (DM, HIV, COPD) and tobacco  
43  
44 282 smoking were associated with DR-TB, still other found no significant  
45  
46 283 relationship between them [14, 16, 23-26]. Based on a real world study, TB,  
47  
48 284 smoking, COPD and HIV had deleterious and synergistic relationship [27].  
49  
50 285 The coexisting of TB and baseline disease may favor the progression of  
51  
52 286 disease and increase the probability of drug-drug interactions or side  
53  
54  
55  
56  
57  
58  
59  
60

1  
2  
3  
4 287 effects. The improvement of health-associated risk factors (e.g. smoking,  
5  
6 288 DM, HIV infection) was reported to mitigate the development and  
7  
8  
9 289 mortality of TB [3]. In this study, 17.5% cases were retreated PTB, among  
10  
11 290 which 18% abuse alcohol, 20.9% were smoker, 37.3% had cavity, 12.5%  
12  
13  
14 291 had comorbidity. The high proportion of those risk factors among retreated  
15  
16  
17 292 PTB in Shandong province deserves more attention.

18  
19 293 DM (51.5%), followed by COPD (16.6%) were the most common  
20  
21  
22 294 comorbidities among retreated PTB in this study. Extra-pulmonary  
23  
24  
25 295 comorbidity (e.g. HIV infection, DM, CKD) can facilitate the development  
26  
27  
28 296 of TB by impairing immune function, increasing bacterial loads [28-30].  
29  
30 297 While, pulmonary comorbidity such as COPD can promote the process of  
31  
32  
33 298 TB by damaging innate lung defence, impairing lung function, and  
34  
35  
36 299 changing lung structure [31, 32]. As reported, DM and COPD can increase  
37  
38 300 the risk of TB by 3.11 (95% CI: 2.27-4.26) and 2.47 (95% CI: 2.21-2.76)  
39  
40  
41 301 compared to control group [11, 33]. DM is one confirmed risk factor for  
42  
43  
44 302 TB which account for 6-24% of TB burden according to geography  
45  
46  
47 303 disparity [34]. DM not only increase the bacillary load of active TB patients  
48  
49  
50 304 but also change the absorption and clearance of drugs. Thus it prolonged  
51  
52  
53 305 the duration of culture conversion and treatment. Similarly, TB and COPD  
54  
55  
56 306 played bi-directional roles by acting as an independent risk factor for the  
57  
58  
59 307 other [24]. In this study, comorbidity not only was a risk factor for DR-TB  
60  
308 and MDR-TB, but also contributed to overall RFP resistance and overall

1  
2  
3  
4 309 SM resistance among retreated PTB patients. Previous study demonstrated  
5  
6 310 that the proportion of DM among TB patients with and without MDR were  
7  
8  
9 311 significantly different (47.2 vs. 28.1%;  $p < 0.05$ ) [16]. TB patients with  
10  
11 312 COPD were 2 times higher to die [23] and 2.5 times higher to have MDR-  
12  
13 313 TB [6] than those without COPD. However, the studies of correlations  
14  
15 314 between TB and coexisting disease mainly focused on the specific DR type  
16  
17 315 (MDR) and viewed all TB patients as a whole. Studies of these correlations  
18  
19 316 on other DR types among retreated PTB patients were very limited. This  
20  
21 317 study found that retreated PTB patients with comorbidity were more likely  
22  
23 318 to develop DR (1.44 times), RFP resistance (2.17 times), SM resistance  
24  
25 319 (1.51 times), and MDR (1.96 times) than those without comorbidity.

26  
27 320 HIV infection was reported to be a major risk factor for TB and DR-TB  
28  
29 321 in many country [3, 30]. With 95,549 new HIV patients and 15,467 HIV-  
30  
31 322 related deaths in 2018, China still confronted with arduous challenges in  
32  
33 323 controlling HIV [35]. However, five of all 31 provinces accounted for  
34  
35 324 approximately the whole burden of HIV in China [36]. Moreover, both the  
36  
37 325 incidence and HIV-related deaths in Shangdong province ranked last but  
38  
39 326 one of all 31 provinces during 2004-2017 [35]. In this study, only three  
40  
41 327 (0.2%) of retreated PTB patients were co-infected with HIV. Accordingly,  
42  
43 328 HIV infection may not be the major factor of TB transmission in Shandong.

44  
45 329 Similarly with previous researches that TB and coexisting disease shared  
46  
47 330 risk factors: age, BMI, cigarette abuse [24, 37]. This study showed that  
48  
49  
50  
51  
52  
53  
54  
55  
56  
57  
58  
59  
60

1  
2  
3  
4 331 retreated PTB with comorbidity were more likely to be male, to be older,  
5  
6 332 with BMI  $\geq 25$ , and to abuse cigarette/alcohol than those without  
7  
8  
9 333 comorbidity. As the condition of retreated PTB patients, especially those  
10  
11 334 with comorbidity are complex, traditional disease-specific health-care  
12  
13  
14 335 strategy may be less effective, multidisciplinary co-operation and  
15  
16  
17 336 integrated therapies towards high-risk population are urgently needed.

18  
19 337 Some information, such as DST for second-line anti-TB drugs, contact  
20  
21  
22 338 history and previous therapeutic regimen were not available in this study,  
23  
24  
25 339 which may influence the results. Moreover, we calculated all comorbidities  
26  
27 340 as a whole factor and did not specify the effect of each comorbidity in detail.  
28  
29  
30 341 In fact, previous investigations had concluded on the relationship between  
31  
32 342 TB and different comorbidity inconsistently. Thus, more detailed and  
33  
34  
35 343 perspective investigations both epidemiological and cellularly/molecularly  
36  
37 344 were urgently needed to further elaborate the contribution of comorbidity  
38  
39  
40 345 to TB/DR-TB in China.

#### 41 42 43 346 **Conclusion:**

44  
45 347 In summary, this study finds that smoking, cavity, and comorbidity are  
46  
47  
48 348 risk factors for DR among retreated PTB in Shandong Province, China.  
49  
50  
51 349 Retreated PTB patients with comorbidity are more likely to be older, with  
52  
53 350 higher proportion of symptoms compared to those without comorbidity.  
54  
55  
56 351 Comorbidity also is a risk factor for overall RFP resistance, overall SM  
57  
58 352 resistance, MDR among retreated PTB patients. This study points out  
59  
60

1  
2  
3  
4 353 several directions for the control of retreated PTB: 1) the improvement of  
5  
6 354 baseline health should be part of TB control; 2) bidirectional screening and  
7  
8  
9 355 coordinated treatment for both TB and comorbidity should be advocated;  
10  
11  
12 356 3) attention on the DR surveillance among TB patients, especially among  
13  
14  
15 357 who had comorbidity were imperative.

### 16 17 358 **Conflict of interests**

18  
19  
20 359 The authors state that they have no conflicts of interest.

### 21 22 360 **Funding statement**

23  
24  
25 361 This work was supported by Department of Science & Technology of  
26  
27 362 Shandong Province (CN) (No.2007GG30002033; 2015GSF121052;  
28  
29  
30 363 No.2017GSF218052) and Jinan Science and Technology Bureau (CN)  
31  
32  
33 364 (No.201704100).

### 34 35 365 **Authors' contributions**

36  
37  
38 366 NNT, YFL and HCL designed this study and drafted the initial  
39  
40  
41 367 manuscript. WMS, JYL, QYZ and TTX collected and analyzed the data.  
42  
43  
44 368 SJL, QQA and SQL coordinated and supervised data collection,  
45  
46  
47 369 constructed the figures and tables.

### 48 49 370 **Patient and Public Involvement**

50  
51 371 Not appropriate.

### 52 53 372 **Data sharing statement**

54  
55  
56 373 No additional data are available.

### 57 58 374 **References**

- 1  
2  
3 375 1. Marais BJ, Lonnroth K, Lawn SD, Migliori GB, Mwaba P, Glaziou P, Bates M, Colagiuri R, Zijenah  
4 376 L, Swaminathan S *et al*: **Tuberculosis comorbidity with communicable and non-**  
5 377 **communicable diseases: integrating health services and control efforts.** *LANCET INFECT*  
6 378 *DIS/21372* 2013, **13**(5):436-448.
- 8 379 2. Bygbjerg IC: **Double burden of noncommunicable and infectious diseases in developing**  
9 380 **countries.** *SCIENCE/34661* 2012, **337**(6101):1499-1501.
- 11 381 3. **World Health Organization. Global tuberculosis report 2019.** *Geneva: World Health*  
12 382 *Organization; 2019* 2019, **WHO/CDS/TB/2019.15**.
- 14 383 4. Monedero I, Caminero JA: **Management of multidrug-resistant tuberculosis: an update.** *THER*  
15 384 *ADV RESPIR DIS/2286* 2010, **4**(2):117-127.
- 17 385 5. Perri BR, Proops D, Moonan PK, Munsiff SS, Kreiswirth BN, Kurepina N, Goranson C, Ahuja SD:  
18 386 **Mycobacterium tuberculosis cluster with developing drug resistance, New York, New York,**  
19 387 **USA, 2003-2009.** *EMERG INFECT DIS/6994* 2011, **17**(3):372-378.
- 21 388 6. Pradipta IS, Forsman LD, Bruchfeld J, Hak E, Alffenaar JW: **Risk factors of multidrug-resistant**  
22 389 **tuberculosis: A global systematic review and meta-analysis.** *J Infect* 2018, **77**(6):469-478.
- 24 390 7. Lonnroth K, Jaramillo E, Williams BG, Dye C, Raviglione M: **Drivers of tuberculosis epidemics:**  
25 391 **the role of risk factors and social determinants.** *SOC SCI MED/2814* 2009, **68**(12):2240-2246.
- 27 392 8. Mulenga EM, Miller HB, Sinkala T, Hysong TA, Burgess JL: **Silicosis and tuberculosis in Zambian**  
28 393 **miners.** *Int J Occup Environ Health* 2005, **11**(3):259-262.
- 30 394 9. National Collaborating Centre for Chronic Conditions (UK) CfC, Practice at NICE (UK) NifHaCE,  
31 395 **Guidance: Tuberculosis: Clinical Diagnosis and Management of Tuberculosis, and Measures**  
32 396 **for Its Prevention and Control.** In., edn. London; 2011.
- 34 397 10. Byrne AL, Marais BJ, Mitnick CD, Lecca L, Marks GB: **Tuberculosis and chronic respiratory**  
35 398 **disease: a systematic review.** *INT J INFECT DIS/2229* 2015, **32**:138-146.
- 37 399 11. Jeon CY, Murray MB: **Diabetes mellitus increases the risk of active tuberculosis: a systematic**  
38 400 **review of 13 observational studies.** *PLOS MED/13585* 2008, **5**(7):e152.
- 40 401 12. De La Rosa GR, Jacobson KL, Rolston KV, Raad, II, Kontoyiannis DP, Safdar A: **Mycobacterium**  
41 402 **tuberculosis at a comprehensive cancer centre: active disease in patients with underlying**  
42 403 **malignancy during 1990-2000.** *Clin Microbiol Infect* 2004, **10**(8):749-752.
- 44 404 13. Baker MA, Harries AD, Jeon CY, Hart JE, Kapur A, Lonnroth K, Ottmani SE, Goonesekera SD,  
45 405 Murray MB: **The impact of diabetes on tuberculosis treatment outcomes: a systematic**  
46 406 **review.** *BMC MED/8005* 2011, **9**:81.
- 48 407 14. Samuels JP, Sood A, Campbell JR, Ahmad Khan F, Johnston JC: **Comorbidities and treatment**  
49 408 **outcomes in multidrug resistant tuberculosis: a systematic review and meta-analysis.** *Sci Rep*  
50 409 *2018*, **8**(1):4980.
- 52 410 15. Crofts JP, Andrews NJ, Barker RD, Delpech V, Abubakar I: **Risk factors for recurrent**  
53 411 **tuberculosis in England and Wales, 1998-2005.** *THORAX/8121* 2010, **65**(4):310-314.
- 55 412 16. Gomez-Gomez A, Magana-Aquino M, Lopez-Meza S, Aranda-Alvarez M, Diaz-Ornelas DE,  
56 413 Hernandez-Segura MG, Salazar-Lezama MA, Castellanos-Joya M, Noyola DE: **Diabetes and**  
57 414 **Other Risk Factors for Multi-drug Resistant Tuberculosis in a Mexican Population with**  
58 415 **Pulmonary Tuberculosis: Case Control Study.** *ARCH MED RES/2219* 2015, **46**(2):142-148.
- 60 416 17. Diande S, Sangare L, Kouanda S, Dingtounda BI, Mourfou A, Ouedraogo F, Sawadogo I, Nebie  
59 417 B, Gueye A, Sawadogo LT *et al*: **Risk factors for multidrug-resistant tuberculosis in four centers**  
60 418 **in Burkina Faso, West Africa.** *MICROB DRUG RESIST/2529* 2009, **15**(3):217-221.



- 1  
2  
3 419 18. Zhao Y, Xu S, Wang L, Chin DP, Wang S, Jiang G, Xia H, Zhou Y, Li Q, Ou X *et al*: **National survey**  
4 420 **of drug-resistant tuberculosis in China.** *N Engl J Med* 2012, **366**(23):2161-2170.
- 5 421 19. Jing H, Wang H, Wang Y, Deng Y, Li X, Liu Z, Graviss EA, Ma X: **Prevalence of nontuberculous**  
6 422 **mycobacteria infection, China, 2004-2009.** *EMERG INFECT DIS/6994* 2012, **18**(3):527-528.
- 7 423 20. Flor de Lima B, Tavares M: **Risk factors for extensively drug-resistant tuberculosis: a review.**  
8 424 *CLIN RESPIR J/2147* 2014, **8**(1):11-23.
- 9 425 21. Jacobs MG, Pelissari DM, Pinto VL: **Factors associated with the drug-resistant tuberculosis**  
10 426 **incidence rate in Brazil.** *Int J Tuberc Lung Dis* 2018, **22**(6):675-680.
- 11 427 22. Zhao P, Li XJ, Zhang SF, Wang XS, Liu CY: **Social behaviour risk factors for drug resistant**  
12 428 **tuberculosis in mainland China: a meta-analysis.** *J INT MED RES/1431* 2012, **40**(2):436-445.
- 13 429 23. Inghammar M, Ekblom A, Engstrom G, Ljungberg B, Romanus V, Lofdahl CG, Egesten A: **COPD**  
14 430 **and the risk of tuberculosis--a population-based cohort study.** *PLOS ONE/3057* 2010,  
15 431 **5**(4):e10138.
- 16 432 24. O'Toole RF, Shukla SD, Walters EH: **TB meets COPD: An emerging global co-morbidity in**  
17 433 **human lung disease.** *Tuberculosis (Edinb)* 2015, **95**(6):659-663.
- 18 434 25. Wang MG, Huang WW, Wang Y, Zhang YX, Zhang MM, Wu SQ, Sandford AJ, He JQ: **Association**  
19 435 **between tobacco smoking and drug-resistant tuberculosis.** *Infect Drug Resist* 2018, **11**:873-  
20 436 887.
- 21 437 26. Hameed S, Ahmad SR, Rahman MAU, Nazir H, Ullah I: **Drug resistance profile of**  
22 438 **Mycobacterium tuberculosis and predictors associated with the development of drug**  
23 439 **resistance.** *J Glob Antimicrob Resist* 2019, **18**:155-159.
- 24 440 27. van Zyl Smit RN, Pai M, Yew WW, Leung CC, Zumla A, Bateman ED, Dheda K: **Global lung health:**  
25 441 **the colliding epidemics of tuberculosis, tobacco smoking, HIV and COPD.** *EUR RESPIR J/8332*  
26 442 2010, **35**(1):27-33.
- 27 443 28. Martens GW, Arian MC, Lee J, Ren F, Greiner D, Kornfeld H: **Tuberculosis susceptibility of**  
28 444 **diabetic mice.** *Am J Respir Cell Mol Biol* 2007, **37**(5):518-524.
- 29 445 29. Romanowski K, Clark EG, Levin A, Cook VJ, Johnston JC: **Tuberculosis and chronic kidney**  
30 446 **disease: an emerging global syndemic.** *KIDNEY INT/7683* 2016, **90**(1):34-40.
- 31 447 30. Bell LCK, Noursadeghi M: **Pathogenesis of HIV-1 and Mycobacterium tuberculosis co-**  
32 448 **infection.** *NAT REV MICROBIOL/24727* 2018, **16**(2):80-90.
- 33 449 31. Sethi S, Murphy TF: **Infection in the pathogenesis and course of chronic obstructive**  
34 450 **pulmonary disease.** *N Engl J Med* 2008, **359**(22):2355-2365.
- 35 451 32. Inghammar M, Lofdahl CG, Winqvist N, Ljungberg B, Egesten A, Engstrom G: **Impaired**  
36 452 **pulmonary function and the risk of tuberculosis: a population-based cohort study.** *EUR*  
37 453 *RESPIR J/8332* 2011, **37**(5):1285-1287.
- 38 454 33. Lee CH, Lee MC, Shu CC, Lim CS, Wang JY, Lee LN, Chao KM: **Risk factors for pulmonary**  
39 455 **tuberculosis in patients with chronic obstructive airway disease in Taiwan: a nationwide**  
40 456 **cohort study.** *BMC INFECT DIS/269* 2013, **13**:194.
- 41 457 34. Workneh MH, Bjune GA, Yimer SA: **Prevalence and associated factors of tuberculosis and**  
42 458 **diabetes mellitus comorbidity: A systematic review.** *PLOS ONE/3057* 2017, **12**(4):e0175925.
- 43 459 35. Xu B, Li J, Wang M: **Epidemiological and time series analysis on the incidence and death of**  
44 460 **AIDS and HIV in China.** *BMC PUBLIC HEALTH/2209* 2020, **20**(1):1906.
- 45 461 36. Zhang L, Chow EP, Jing J, Zhuang X, Li X, He M, Sun H, Li X, Gorgens M, Wilson D *et al*: **HIV**  
46 462 **prevalence in China: integration of surveillance data and a systematic review.** *LANCET INFECT*

1  
2  
3  
4  
5  
6  
7  
8  
9  
10  
11  
12  
13  
14  
15  
16  
17  
18  
19  
20  
21  
22  
23  
24  
25  
26  
27  
28  
29  
30  
31  
32  
33  
34  
35  
36  
37  
38  
39  
40  
41  
42  
43  
44  
45  
46  
47  
48  
49  
50  
51  
52  
53  
54  
55  
56  
57  
58  
59  
60

463 *DIS/21372* 2013, **13**(11):955-963.  
464 37. Fletcher B, Gulanick M, Lamendola C: **Risk factors for type 2 diabetes mellitus.** *J CARDIOVASC*  
465 *NURS/2172* 2002, **16**(2):17-23.  
466 **Figure 1.** TB cases in Shandong, China. DST, drug-susceptibility testing; NTM, *nontuberculous mycobacteria*; PTB,  
467 pulmonary tuberculosis.

For peer review only

**Table 1.** Characteristics of new and retreated PTB patients, Shandong, China, 2004–2019

| Characteristics | New treated PTB (n=9051)     |                     |                                        |           |                                           |           | Retreated PTB (n=1924)       |                    |                                        |           |                                           |           | Total (n=10975)      |
|-----------------|------------------------------|---------------------|----------------------------------------|-----------|-------------------------------------------|-----------|------------------------------|--------------------|----------------------------------------|-----------|-------------------------------------------|-----------|----------------------|
|                 | Susceptible<br>N=7348 (81.2) | DR<br>N=1703 (18.8) | Univariable<br>analysis<br>OR (95% CI) | P value   | Multivariable<br>analysis<br>aOR (95% CI) | P value   | Susceptible<br>N=1420 (73.8) | DR<br>N=504 (26.2) | Univariable<br>analysis<br>OR (95% CI) | P value   | Multivariable<br>analysis<br>aOR (95% CI) | P value   |                      |
| Age             | 50.0±19.9                    | 48.3±19.1           | 0.996 (0.993-0.998)                    | 0.001     | 0.994 (0.991-0.998)                       | 0.001     | 51.0±19.8                    | 48.7±18.6          | 0.994 (0.989-0.999)                    | 0.021     | 0.986 (0.980-0.993)                       | <0.001    | 49.8±19.7            |
| Sex (male)      | 6098/7348<br>(83.0)          | 1460/1703<br>(85.7) |                                        | 0.006     | 1.249 (1.033-1.510)                       | 0.022     | 1155/1420<br>(81.3)          | 417/1420<br>(29.3) | 1.100 (0.842-1.436)                    | 0.485     | 1.202 (0.865-1.670)                       | 0.273     | 9130/10975<br>(83.2) |
| BMI             |                              |                     |                                        |           |                                           |           |                              |                    |                                        |           |                                           |           |                      |
| <18.5           | 1550/6627<br>(23.4)          | 352/1548<br>(22.7)  | 0.949 (0.723-1.247)                    | 0.708     | 0.917 (0.675-1.246)                       | 0.581     | 354/1309<br>(27.0)           | 135/468<br>(28.8)  | 0.554 (0.336-0.911)                    | 0.020     | 0.557 (0.316-0.983)                       | 0.044     | 2391/9952<br>(24.0)  |
| 18.5-24.9       | 4751/6627<br>(71.17)         | 1118/1548<br>(72.2) | 0.984 (0.762-1.270)                    | 0.899     | 0.981 (0.690-1.223)                       | 0.560     | 910/1309<br>(69.5)           | 320/468<br>(68.5)  | 0.482 (0.299-0.775)                    | 0.003     | 0.448 (0.260-0.774)                       | 0.004     | 7081/9952<br>(71.2)  |
| ≥25             | 326/6627 (4.9)               | 78/1548 (5.0)       | Reference                              | Reference | Reference                                 | Reference | 45/1309 (3.4)                | 31/468 (6.6)       | Reference                              | Reference | Reference                                 | Reference | 480/9952 (4.8)       |
| Alcohol abuse   | 1246/5779<br>(21.6)          | 251/1291<br>(19.4)  | 1.139 (0.979-1.325)                    | 0.092     | 0.868 (0.707-1.067)                       | 0.179     | 242/1355<br>(17.9)           | 85/459 (18.5)      | 1.045 (0.795-1.374)                    | 0.751     | 0.820 (0.568-1.185)                       | 0.291     | 1824/8884<br>(20.5)  |
| Smoking         | 1475/5822<br>(25.3)          | 318/1299<br>(24.5)  | 1.047 (0.910-1.204)                    | 0.521     | 1.033 (0.851-1.255)                       | 0.741     | 264/1360<br>(19.4)           | 116/461<br>(25.2)  | 1.396 (1.088-1.792)                    | 0.009     | 1.687 (1.191-2.388)                       | 0.003     | 2173/8942<br>(24.3)  |
| Cavity          | 2765/6201<br>(44.6)          | 689/1452<br>(47.5)  | 0.891 (0.795-0.999)                    | 0.049     | 1.152 (1.012-1.312)                       | 0.033     | 444/1299<br>(34.2)           | 205/442<br>(46.4)  | 1.666 (1.338-2.074)                    | <0.001    | 1.550 (1.219-1.971)                       | <0.001    | 4103/9394<br>(43.7)  |
| Comorbidity     | 1032/7348 (14)               | 246/1703<br>(14.4)  | 1.033 (0.889-1.201)                    | 0.669     | 1.079 (0.901-1.293)                       | 0.408     | 159/1420<br>(11.2)           | 82/504 (16.3)      | 1.541 (1.155-2.056)                    | 0.003     | 1.436 (1.020-2.022)                       | 0.038     | 1519/10975<br>(13.8) |

aOR, adjusted odds ratio; BMI, body mass index; CI, confidence interval; DR, drug-resistant; PTB, pulmonary tuberculosis.

**Table 2.** Demographic and clinical characteristics of 1924 retreated PTB patients.

| Characteristics                 | Total<br>N=1924 | PTB patients with comorbidity<br>N=241 | PTB patients without comorbidity<br>N=1683 | P value   |
|---------------------------------|-----------------|----------------------------------------|--------------------------------------------|-----------|
| Age                             | 50.43±19.53     | 60.05±15.87                            | 49.05±19.62                                | <0.001    |
| 0-14                            | 4 (0.2)         | 0 (0)                                  | 4 (0.2)                                    | 1         |
| 15-44                           | 737 (38.3)      | 42 (17.4)                              | 695 (41.3)                                 | <0.001    |
| 45-64                           | 661 (34.4)      | 99 (41.1)                              | 562 (33.4)                                 | 0.019     |
| >65                             | 522 (27.1)      | 100 (41.5)                             | 422 (25.1)                                 | <0.001    |
| Sex (male)                      | 1572 (81.7)     | 210 (87.1)                             | 1362 (80.9)                                | 0.02      |
| BMI (N=1777/230/1547)           |                 |                                        |                                            |           |
| <18.5                           | 489 (25.4)      | 56 (23.2)                              | 433 (25.7)                                 | reference |
| 18.5-24.9                       | 1212 (63.0)     | 155 (64.3)                             | 1057 (62.8)                                | 0.449     |
| ≥25                             | 76 (4.0)        | 19 (7.9)                               | 57 (3.4)                                   | <0.001    |
| Alcohol abuse (N=1814/233/1581) | 327 (18.0)      | 58 (24.9)                              | 269 (17.0)                                 | 0.003     |
| Smoking (N=1821/233/ 1588)      | 380 (20.9)      | 70 (30.0)                              | 310 (19.5)                                 | <0.001    |
| Symptom                         |                 |                                        |                                            |           |
| Cough                           | 1840 (95.6)     | 226 (93.8)                             | 1614 (95.9)                                | 0.131     |
| Expectoration                   | 1504 (78.3)     | 205 (85.1)                             | 1299 (77.2)                                | 0.006     |
| Fever                           | 901 (46.8)      | 104 (43.2)                             | 797 (47.4)                                 | 0.221     |
| Night sweat                     | 434 (22.6)      | 45 (18.7)                              | 389 (23.1)                                 | 0.123     |
| Fatigue                         | 756 (39.3)      | 90 (37.3)                              | 666 (39.6)                                 | 0.508     |
| Haemoptysis                     | 266 (13.8)      | 53 (22.0)                              | 213 (12.7)                                 | <0.001    |
| Weight loss                     | 274 (14.2)      | 47 (19.5)                              | 227 (13.5)                                 | 0.012     |
| Chest pain                      | 217 (11.3)      | 32 (13.3)                              | 185 (11.0)                                 | 0.294     |
| TB contact (N=720/162/558)      | 29 (4.0)        | 7 (4.3)                                | 22 (3.9)                                   | 0.829     |
| Cavity (N=1741/219/ 1522)       | 649 (37.3)      | 115 (52.5)                             | 534 (35.1)                                 | <0.001    |

BMI, body mass index; PTB, pulmonary tuberculosis.

**Table 3.** Drug-resistant profiles among retreated PTB patients.

| Types                              | Total<br>N=1924 | With comorbidity<br>N=241 | Without comorbidity<br>N=1683 | P value |
|------------------------------------|-----------------|---------------------------|-------------------------------|---------|
| DR-TB                              | 504 (26.2)      | 82 (34.0)                 | 422 (25.1)                    | 0.003   |
| Any resistance to first-line drugs |                 |                           |                               |         |
| INH                                | 324 (16.8)      | 55 (22.8)                 | 269 (16.0)                    | 0.008   |
| RFP                                | 229 (11.9)      | 47 (19.5)                 | 182 (10.8)                    | <0.001  |
| EMB                                | 63 (3.3)        | 12 (5.0)                  | 51 (3.0)                      | 0.112   |
| SM                                 | 325 (16.9)      | 51 (21.2)                 | 274 (16.3)                    | 0.059   |
| Others                             | 227 (11.8)      | 30 (12.4)                 | 197 (11.7)                    | 0.738   |
| Mono-resistant tuberculosis        | 85 (4.4)        | 10 (4.1)                  | 75 (4.5)                      | 0.828   |
| INH                                | 32 (1.7)        | 9 (3.7)                   | 23 (1.4)                      | 0.007   |
| RFP                                | 7 (0.4)         | 1 (0.4)                   | 6 (0.4)                       | 1       |
| EMB                                | 98 (5.1)        | 9 (3.7)                   | 89 (5.3)                      | 0.305   |
| SM                                 | 5 (0.3)         | 1 (0.4)                   | 4 (0.2)                       | 0.488   |
| Others                             | 117 (6.1)       | 21 (8.7)                  | 96 (5.7)                      | 0.067   |
| Polydrug resistant tuberculosis    | 1 (0.1)         | 1 (0.4)                   | 0 (0)                         | 0.125   |
| INH + EMB                          | 72 (3.7)        | 10 (4.1)                  | 62 (3.7)                      | 0.722   |
| INH + SM                           | 4 (0.2)         | 1 (0.4)                   | 3 (0.2)                       | 0.415   |
| RFP + EMB                          | 28 (1.5)        | 6 (2.5)                   | 22 (1.3)                      | 0.151   |
| RFP + SM                           | 6 (0.3)         | 3 (1.2)                   | 3 (0.2)                       | 0.029   |
| INH + EMB + SM                     | 6 (0.3)         | 0 (0)                     | 6 (0.4)                       | 1       |
| MDR-TB (Total)                     | 160 (8.3)       | 31 (12.9)                 | 129 (7.7)                     | 0.006   |
| INH + RFP                          | 36 (1.9)        | 7 (2.9)                   | 29 (1.7)                      | 0.206   |
| INH + RFP + EMB                    | 7 (0.4)         | 1 (0.4)                   | 6 (0.4)                       | 1       |
| INH + RFP + EMB + SM               | 28 (1.5)        | 5 (2.1)                   | 23 (1.4)                      | 0.391   |

|                |          |          |          |       |
|----------------|----------|----------|----------|-------|
| INH + RFP + SM | 77 (4.0) | 16 (6.6) | 61 (3.6) | 0.026 |
| others         | 12 (0.6) | 2 (0.8)  | 10 (0.6) | 0.655 |

DR, drug-resistant; EMB, ethambutol; INH, isoniazid; MDR, multidrug-resistant; PTB, pulmonary tuberculosis; RFP, rifampicin; SM, streptomycin; TB, tuberculosis.

**Table 4.** Comorbidities detected among retreated PTB patients.

| Comorbidity             | INH<br>N=324 | RFP<br>N=229 | MDR<br>N=160 | DR<br>N=504 | Susceptible<br>N=1420 | Total<br>N=1924 |
|-------------------------|--------------|--------------|--------------|-------------|-----------------------|-----------------|
| Extra-pulmonary disease | 47 (14.5)    | 41 (17.9)    | 28 (17.5)    | 69 (13.7)   | 118 (8.3)             | 187 (9.7)       |
| DM                      | 30 (9.3)     | 32 (14.0)    | 21 (13.1)    | 48 (9.5)    | 76 (5.4)              | 124 (6.4)       |
| Hypertension            | 7 (2.2)      | 2 (0.9)      | 1 (0.6)      | 10 (2.0)    | 19 (1.3)              | 29 (1.5)        |
| Gastrointestinal cancer | 1 (0.3)      | 0 (0)        | 0 (0)        | 1 (0.2)     | 4 (0.3)               | 5 (0.3)         |
| Hepatitis               | 4 (1.2)      | 2 (0.9)      | 2 (1.3)      | 4 (0.8)     | 12 (0.9)              | 16 (0.8)        |
| CRF                     | 0 (0)        | 0 (0)        | 0 (0)        | 0 (0)       | 1 (0.1)               | 1 (0.1)         |
| CTD                     | 2 (0.6)      | 1 (0.4)      | 1 (0.6)      | 2 (0.4)     | 2 (0.1)               | 4 (0.2)         |
| Malignancy              | 2 (0.6)      | 0 (0)        | 0 (0)        | 3 (0.6)     | 16 (1.1)              | 19 (1.0)        |
| Disability              | 1 (0.3)      | 0 (0)        | 0 (0)        | 1 (0.2)     | 5 (0.4)               | 6 (0.3)         |
| HIV infection           | 1 (0.3)      | 3 (1.3)      | 1 (0.6)      | 3 (0.6)     | 0 (0)                 | 3 (0.2)         |
| Pulmonary disease       | 11 (3.4)     | 9 (3.9)      | 5 (3.1)      | 17 (3.4)    | 49 (3.5)              | 66 (3.4)        |
| Silicosis               | 1 (0.3)      | 1 (0.4)      | 0 (0)        | 3 (0.6)     | 3 (0.2)               | 6 (0.3)         |
| Asthma                  | 1 (0.3)      | 0 (0)        | 0 (0)        | 1 (0.2)     | 10 (0.7)              | 11 (0.6)        |
| COPD                    | 6 (1.9)      | 7 (3.06)     | 4 (2.5)      | 9 (1.8)     | 31 (2.2)              | 40 (2.1)        |
| Bronchiectasia          | 4 (1.2)      | 1 (0.4)      | 1 (0.6)      | 4 (0.8)     | 8 (0.6)               | 12 (0.6)        |
| Lung cancer             | 0 (0)        | 0 (0)        | 0 (0)        | 1 (0.2)     | 4 (0.3)               | 5 (0.3)         |
| Others                  | 1 (0.3)      | 0 (0)        | 0 (0)        | 2 (0.4)     | 2 (0.1)               | 4 (0.2)         |
| Number of comorbidities | 55 (17.0)    | 47 (20.5)    | 31 (19.4)    | 82 (16.3)   | 159 (11.2)            | 241 (12.5)      |
| 1                       | 48 (14.8)    | 44 (19.2)    | 29 (18.1)    | 72 (14.3)   | 132 (9.3)             | 204 (10.6)      |
| 2                       | 6 (1.9)      | 2 (0.9)      | 2 (1.3)      | 8 (1.6)     | 21 (1.5)              | 29 (1.5)        |

|                          |           |           |           |           |           |           |
|--------------------------|-----------|-----------|-----------|-----------|-----------|-----------|
| ≥3                       | 1 (0.3)   | 1 (0.4)   | 0 (0)     | 2 (0.4)   | 6 (0.4)   | 8 (0.4)   |
| Pulmonary alone          | 8 (2.5)   | 6 (2.6)   | 3 (1.9)   | 13 (2.6)  | 41 (2.9)  | 54 (2.8)  |
| Extra-pulmonary alone    | 44 (13.6) | 38 (16.6) | 26 (16.3) | 65 (12.9) | 110 (7.8) | 175 (9.1) |
| Pulmonary+extrapulmonary | 3 (0.9)   | 3 (1.3)   | 2 (1.3)   | 4 (0.8)   | 8 (0.6)   | 12 (0.6)  |

COPD, chronic obstructive pulmonary disease; CRF, chronic renal failure; CTD, connective tissue disease; DM, diabetes mellitus; HIV, human immunodeficiency virus; PTB, pulmonary tuberculosis.

**Table 5.** Association between comorbidity and anti-tuberculosis drug resistance among retreated PTB patients.

| Type                               | Univariable         |           | Multivariable       |           |
|------------------------------------|---------------------|-----------|---------------------|-----------|
|                                    | OR (95%CI)          | p value   | aOR (95%CI)         | p value   |
| Any resistance to first-line drugs |                     |           |                     |           |
| INH                                | 1.622 (1.162-2.264) | 0.005     | 1.488 (0.997-2.221) | 0.052     |
| RFP                                | 2.048 (1.428-2.937) | <0.001    | 2.173 (1.408-3.355) | <0.001    |
| EMB                                | 1.866 (0.974-3.575) | 0.06      | 1.643 (0.712-3.790) | 0.244     |
| SM                                 | 1.476 (1.049-2.077) | 0.025     | 1.511 (1.004-2.272) | 0.048     |
| Mono-resistant tuberculosis        | 1.208 (0.795-1.835) | 0.376     | 1.144 (0.703-1.861) | 0.587     |
| Polydrug resistant tuberculosis    | 1.735 (1.052-2.861) | 0.031     | 1.546 (0.811-2.944) | 0.185     |
| MDR-TB                             | 1.906 (1.246-2.916) | 0.003     | 1.956 (1.171-3.265) | 0.01      |
| Pan susceptible                    | reference           | reference | reference           | reference |

aOR, adjusted odds ratio; CI, confidence interval; EMB, ethambutol; INH, isoniazid; MDR, multidrug-resistant; OR, odds ratio; PTB, pulmonary tuberculosis; RFP, rifampicin; SM, streptomycin; TB, tuberculosis.

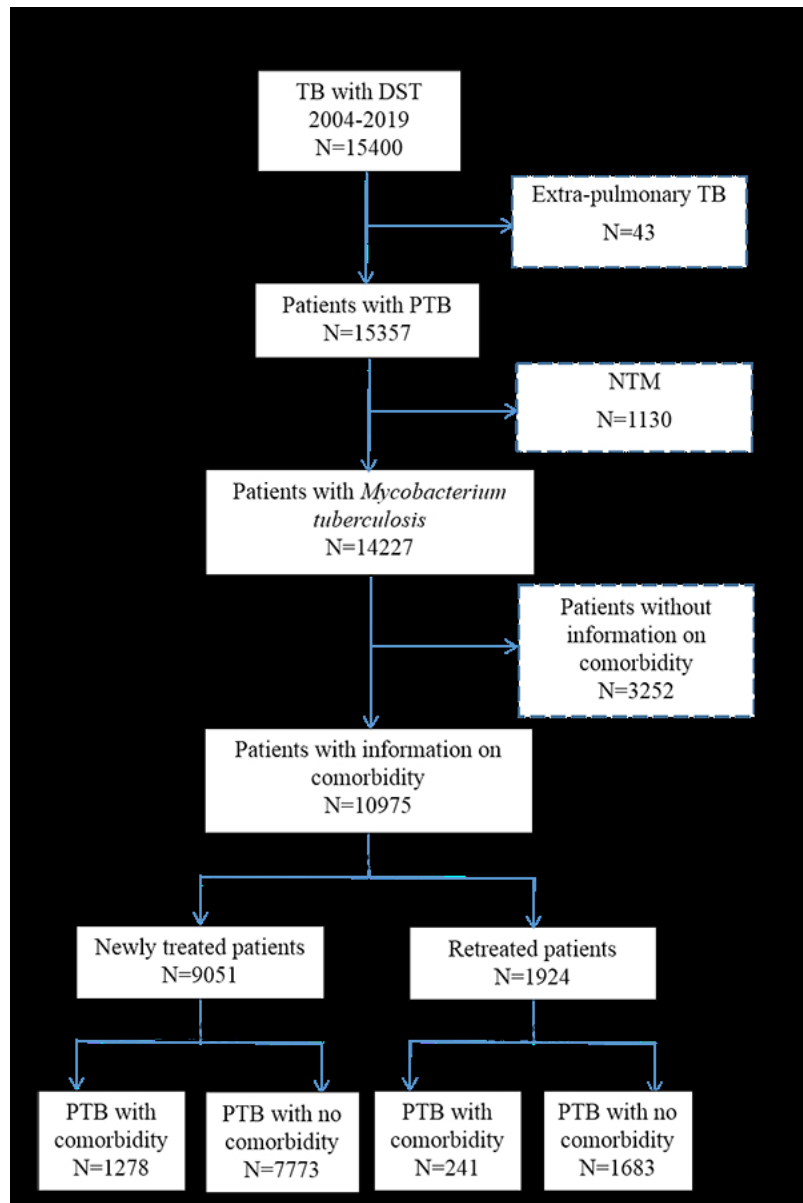

45 Figure 1. TB cases in Shandong, China. DST, drug-susceptibility testing; NTM, nontuberculous mycobacteria;  
46 PTB, pulmonary tuberculosis.

47 51x76mm (300 x 300 DPI)



**STROBE 2007 (v4) Statement—Checklist of items that should be included in reports of *cohort studies***

| Section/Topic                | Item # | Recommendation                                                                                                                                                                       | Reported on page # |
|------------------------------|--------|--------------------------------------------------------------------------------------------------------------------------------------------------------------------------------------|--------------------|
| Title and abstract           | 1      | (a) Indicate the study's design with a commonly used term in the title or the abstract                                                                                               | 1-3                |
|                              |        | (b) Provide in the abstract an informative and balanced summary of what was done and what was found                                                                                  | 1-3                |
| Introduction                 |        |                                                                                                                                                                                      | <b>4-6</b>         |
| Background/rationale         | 2      | Explain the scientific background and rationale for the investigation being reported                                                                                                 | 4-5                |
| Objectives                   | 3      | State specific objectives, including any prespecified hypotheses                                                                                                                     | 5-6                |
| Methods                      |        |                                                                                                                                                                                      | <b>6-9</b>         |
| Study design                 | 4      | Present key elements of study design early in the paper                                                                                                                              | 6-7                |
| Setting                      | 5      | Describe the setting, locations, and relevant dates, including periods of recruitment, exposure, follow-up, and data collection                                                      | 6                  |
| Participants                 | 6      | (a) Give the eligibility criteria, and the sources and methods of selection of participants. Describe methods of follow-up                                                           | 6-9                |
|                              |        | (b) For matched studies, give matching criteria and number of exposed and unexposed                                                                                                  |                    |
| Variables                    | 7      | Clearly define all outcomes, exposures, predictors, potential confounders, and effect modifiers. Give diagnostic criteria, if applicable                                             | 7-9                |
| Data sources/<br>measurement | 8*     | For each variable of interest, give sources of data and details of methods of assessment (measurement). Describe comparability of assessment methods if there is more than one group | 9                  |
| Bias                         | 9      | Describe any efforts to address potential sources of bias                                                                                                                            | 9                  |

|                        |     |                                                                                                                                                                                                              |          |
|------------------------|-----|--------------------------------------------------------------------------------------------------------------------------------------------------------------------------------------------------------------|----------|
| Study size             | 10  | Explain how the study size was arrived at                                                                                                                                                                    | 6-7      |
| Quantitative variables | 11  | Explain how quantitative variables were handled in the analyses. If applicable, describe which groupings were chosen and why                                                                                 | 9        |
| Statistical methods    | 12  | (a) Describe all statistical methods, including those used to control for confounding                                                                                                                        | 9        |
|                        |     | (b) Describe any methods used to examine subgroups and interactions                                                                                                                                          | 9        |
|                        |     | (c) Explain how missing data were addressed                                                                                                                                                                  | 9        |
|                        |     | (d) If applicable, explain how loss to follow-up was addressed                                                                                                                                               | 9        |
|                        |     | (e) Describe any sensitivity analyses                                                                                                                                                                        | 9        |
| <b>Results</b>         |     |                                                                                                                                                                                                              | 10-12    |
| Participants           | 13* | (a) Report numbers of individuals at each stage of study—eg numbers potentially eligible, examined for eligibility, confirmed eligible, included in the study, completing follow-up, and analysed            | 10       |
|                        |     | (b) Give reasons for non-participation at each stage                                                                                                                                                         | 10       |
|                        |     | (c) Consider use of a flow diagram                                                                                                                                                                           | Figure 1 |
| Descriptive data       | 14* | (a) Give characteristics of study participants (eg demographic, clinical, social) and information on exposures and potential confounders                                                                     | 10       |
|                        |     | (b) Indicate number of participants with missing data for each variable of interest                                                                                                                          | 10       |
|                        |     | (c) Summarise follow-up time (eg, average and total amount)                                                                                                                                                  | 10       |
| Outcome data           | 15* | Report numbers of outcome events or summary measures over time                                                                                                                                               | 10       |
| Main results           | 16  | (a) Give unadjusted estimates and, if applicable, confounder-adjusted estimates and their precision (eg, 95% confidence interval). Make clear which confounders were adjusted for and why they were included | 10-12    |

|                          |    |                                                                                                                                                                            |       |
|--------------------------|----|----------------------------------------------------------------------------------------------------------------------------------------------------------------------------|-------|
|                          |    | (b) Report category boundaries when continuous variables were categorized                                                                                                  | 10-12 |
|                          |    | (c) If relevant, consider translating estimates of relative risk into absolute risk for a meaningful time period                                                           | 10-12 |
| Other analyses           | 17 | Report other analyses done—eg analyses of subgroups and interactions, and sensitivity analyses                                                                             | 10-12 |
| <b>Discussion</b>        |    |                                                                                                                                                                            | 12-16 |
| Key results              | 18 | Summarise key results with reference to study objectives                                                                                                                   | 12-16 |
| <b>Limitations</b>       |    |                                                                                                                                                                            | 3,16  |
| Interpretation           | 20 | Give a cautious overall interpretation of results considering objectives, limitations, multiplicity of analyses, results from similar studies, and other relevant evidence | 12-17 |
| Generalisability         | 21 | Discuss the generalisability (external validity) of the study results                                                                                                      | 12-17 |
| <b>Other information</b> |    |                                                                                                                                                                            | 17-25 |
| Funding                  | 22 | Give the source of funding and the role of the funders for the present study and, if applicable, for the original study on which the present article is based              | 17    |

\*Give information separately for cases and controls in case-control studies and, if applicable, for exposed and unexposed groups in cohort and cross-sectional studies.

**Note:** An Explanation and Elaboration article discusses each checklist item and gives methodological background and published examples of transparent reporting. The STROBE checklist is best used in conjunction with this article (freely available on the Web sites of PLoS Medicine at <http://www.plosmedicine.org/>, Annals of Internal Medicine at <http://www.annals.org/>, and Epidemiology at <http://www.epidem.com/>). Information on the STROBE Initiative is available at [www.strobe-statement.org](http://www.strobe-statement.org).
